# Supplementary material for: An updated phylogeography and population dynamics of porcine circovirus 2 genotypes: are they reaching an equilibrium?
Source: Frontiers journal article supplement (doi:10.3389/fmicb.2024.1500498), 2024-10-29
Supplement: Data_Sheet_1.zip [file Data_Sheet_1.zip]

## Sheet: SupplementaryTable1
Acc.Number	Country	Collection date
PP965276.1	SouthKorea	2021
PP927791.1	China	2024-05-12
PP927798.1	China	2024-05-12
PP927801.1	China	2024-05-12
PP927815.1	China	2024-05-12
PP339734.1	China	2023
PP339737.1	China	2023
PP339738.1	China	2023
PP339739.1	China	2023
PP339741.1	China	2023
PP339742.1	China	2023
PP179083.1	China	2023
PP179096.1	China	2023
PP179129.1	China	2023
PP179130.1	China	2023
PP179133.1	China	2023
PP179134.1	China	2023
PP179142.1	China	2023
PP179144.1	China	2023
PP158540.1	China	2015
PP035186.1	China	2021
PP028551.1	China	2023
PP028554.1	China	2023
PP028555.1	China	2023
PP028556.1	China	2023
OR591996.1	Ukraine	2012
OR591999.1	Ukraine	2012
OR552397.1	China	2023
OR537639.1	China	2017
OR537663.1	China	2018
OR537664.1	China	2018
OR537665.1	China	2018
OR537666.1	China	2018
OR537675.1	China	2018
OR537676.1	China	2018
OR537680.1	China	2018
OR537681.1	China	2018
OR537682.1	China	2018
OR537686.1	China	2019
OR533431.1	China	2015
OR533437.1	China	2016
OR533462.1	China	2015
OR533464.1	China	2015
OR533473.1	China	2014
OR533476.1	China	2014
OR542939.1	China	2020
OR542940.1	China	2020
OR542942.1	China	2021
OR542948.1	China	2021
OR542949.1	China	2021
OR542953.1	China	2021
OR542954.1	China	2021
OR567174.1	China	2016
OR567177.1	China	2014
OR567187.1	China	2015
OR567188.1	China	2015
OR567203.1	China	2017
OR567230.1	China	2018
OR567231.1	China	2018
OR567232.1	China	2018
OR567236.1	China	2020
OR567237.1	China	2020
OR567238.1	China	2020
OR567239.1	China	2021
OR567242.1	China	2019
OR480419.1	China	2017-10-24
OR480420.1	China	2017-10-24
OR480421.1	China	2017-10-24
OR480422.1	China	2017-10-24
OR480423.1	China	2018-03-12
OR480424.1	China	2018-04-08
OR480425.1	China	2018-04-08
OR480426.1	China	2018-04-08
OR480427.1	China	2018-03-12
OR480428.1	China	2018-03-12
OR480429.1	China	2018-03-12
OR480430.1	China	2018-04-08
OR480431.1	China	2018-04-08
MZ606300.1	China	2018
MZ606301.1	China	2018
MZ606306.1	China	2018
MZ606314.1	China	2019
MZ606315.1	China	2019
MZ606319.1	China	2019
MZ606325.1	China	2019
MZ615667.1	China	2018
MZ615668.1	China	2018
MZ615673.1	China	2019
MZ615677.1	China	2019
OQ749413.1	China	2020-11-11
OR114689.1	China	2023-05-11
OQ241209.1	Canada	2021
OQ241216.1	Canada	2021
OQ291185.1	China	2021-05-01
OP899451.1	Italy	2021
OP899455.1	Italy	2022
OP899473.1	Italy	2020
OP899477.1	Italy	2020
OP899483.1	Italy	2021-11-12
OP899489.1	Italy	2021
OP899491.1	Italy	2019
OP899501.1	Italy	2021
OP899514.1	Italy	2021
OP899515.1	Italy	2021
OP899522.1	Italy	2021
OP899529.1	Italy	2022-01-21
OP899543.1	Italy	2022-04-11
OP374033.1	China	2022-06
OP184978.1	Tanzania	2019-08-20
OP184979.1	Tanzania	2019-08-20
OP535524.1	Colombia	2021
OP535530.1	Colombia	2021
OP113847.1	China	2021
OP036739.1	China	2022-06-06
ON862546.1	China	2021
ON862549.1	China	2021
ON862550.1	China	2021
ON862551.1	China	2021
ON862552.1	China	2021
ON862553.1	China	2021
ON862554.1	China	2022
ON862557.1	China	2022
ON862558.1	China	2022
ON862559.1	China	2022
ON862560.1	China	2022
ON248854.1	China	2021-11-01
OM274021.1	China	2020
OM677715.1	Taiwan	2018-06-13
OM681485.1	Taiwan	2020-01-01
OM681489.1	Taiwan	2020-02-19
OM288650.1	China	2019
OM302235.1	India	2019-01
OP189294.1	China	2022-05
MZ593749.1	China	2021
MZ593751.1	China	2021
MZ593758.1	China	2021
MZ593762.1	China	2021
MZ593763.1	China	2021
MZ593768.1	China	2021
MZ747112.1	China	2018
ON012606.1	China	2021
ON012607.1	China	2021
ON262084.1	China	2021-03-01
ON262093.1	China	2021-04-17
ON262094.1	China	2021-03-31
ON262097.1	China	2021-07-07
ON262098.1	China	2021-12-21
ON098547.1	Nigeria	2014-02
ON098548.1	Nigeria	2014-02
ON098549.1	Nigeria	2014-02
ON098550.1	Nigeria	2014-02
ON098551.1	Nigeria	2014-02
ON098553.1	Nigeria	2014-02
ON098559.1	Nigeria	2015-06
MZ995483.1	China	2020
MZ995487.1	China	2019
MW653453.1	China	2020-04
MW974883.1	China	2019
MW561983.1	China	2019
MW561985.1	China	2019
MW561988.1	China	2019
MW561989.1	China	2019
MW561994.1	China	2018
MW561998.1	China	2018
MW562001.1	China	2019
MW562003.1	China	2019
OL376975.1	USA	2017
OL376979.1	USA	2017
OL376981.1	USA	2017
OL376983.1	USA	2017
OL376984.1	USA	2017
OL376989.1	USA	2017
OL376993.1	USA	2017
OL376996.1	USA	2017
OL376998.1	USA	2017
OL377002.1	USA	2017
OL377004.1	USA	2017
OL377008.1	USA	2017
OL377016.1	USA	2017
OL377017.1	USA	2017
OL377019.1	USA	2017
OL377020.1	USA	2017
OL377024.1	USA	2017
OL377027.1	USA	2017
OL377030.1	USA	2017
OL377033.1	USA	2017
OL377036.1	USA	2017
OL377037.1	USA	2017
OL377042.1	USA	2017
OL377045.1	USA	2017
OL377046.1	USA	2017
OL377047.1	USA	2017
OL377049.1	USA	2017
OL377050.1	USA	2017
OL377051.1	USA	2017
OL377052.1	USA	2017
OL377055.1	USA	2017
OL377059.1	USA	2017
OL377060.1	USA	2017
OL377061.1	USA	2017
OL377062.1	USA	2017
OL377066.1	USA	2018
OL377072.1	USA	2018
OL377076.1	USA	2018
OL377079.1	USA	2018
OL377090.1	USA	2018
OL377092.1	USA	2018
OL377095.1	USA	2018
OL377099.1	USA	2018
OL377102.1	USA	2018
OL377104.1	USA	2018
OL377107.1	USA	2018
OL377109.1	USA	2018
OL377110.1	USA	2018
OL377115.1	USA	2018
OL377116.1	USA	2018
OL377118.1	USA	2018
OL377119.1	USA	2018
OL377121.1	USA	2018
OL377128.1	USA	2018
OL377129.1	USA	2018
OL377131.1	USA	2018
OL377132.1	USA	2018
OL377135.1	USA	2018
OL377139.1	USA	2018
OL377141.1	USA	2018
OL377142.1	USA	2018
OL377143.1	USA	2018
OL377149.1	USA	2018
OL377152.1	USA	2018
OL377153.1	USA	2018
OL377154.1	USA	2018
OL377155.1	USA	2018
OL377159.1	USA	2018
OL377161.1	USA	2018
OL377162.1	USA	2018
OL377166.1	USA	2018
OL377275.1	Poland	2017
OL377276.1	Poland	2017
OL377277.1	Poland	2017
OL377278.1	Poland	2017
OL377279.1	Poland	2017
OL377280.1	Poland	2017
OL377290.1	Spain	2020
OL377291.1	Spain	2020
OL377307.1	UnitedKingdom	2019
OL377308.1	UnitedKingdom	2019
OL377319.1	Chile	2020
OL377320.1	Belgium	2019
OL377322.1	Belgium	2019
OL377324.1	Belgium	2019
OL377326.1	Netherlands	2019
OL377328.1	Netherlands	2019
OL377334.1	Netherlands	2019
OL377341.1	France	2020
OL377350.1	Germany	2019
OL377351.1	Germany	2019
OL377352.1	Germany	2019
OL377353.1	Germany	2019
OL377354.1	Germany	2019
OL377355.1	Germany	2019
OL377356.1	Germany	2019
OL377357.1	Germany	2019
OL377358.1	Germany	2018
OL377359.1	Germany	2018
OL377372.1	Mexico	2018
OL377376.1	Mexico	2018
OL377470.1	France	2019
OL377475.1	France	2020
OL377476.1	France	2019
OL377477.1	France	2019
OL377505.1	Japan	2019
OL377563.1	Japan	2020
OL377566.1	Japan	2020
OL377567.1	Japan	2020
OL377569.1	Japan	2020
OL377580.1	Japan	2020
OL377599.1	Japan	2020
OL377602.1	Japan	2020
OL377640.1	Japan	2020
OL377646.1	Japan	2020
OL377653.1	Taiwan	2018
OL377667.1	Taiwan	2020
OL377668.1	Taiwan	2020
OL377674.1	Chile	2021
OL377677.1	Chile	2021
OL377678.1	Chile	2021
OL377679.1	Chile	2021
OL377682.1	Canada	2021
OL377683.1	Canada	2021
OL377684.1	Canada	2021
OL377685.1	Canada	2021
OL377688.1	France	2020
OL377716.1	Germany	2021
OM524604.1	Malaysia	2019
OM524649.1	Malaysia	2019
MZ161162.1	China	2021-01-04
MW089619.1	China	2016
MW089620.1	China	2016
MW089622.1	China	2016
MW089632.1	China	2016
MW089637.1	China	2016
MW089638.1	China	2016
MW089643.1	China	2016
MW089644.1	China	2016
MW089647.1	China	2016
MW089650.1	China	2016
MW089651.1	China	2016
MW089652.1	China	2016
MW089672.1	China	2017
MW089673.1	China	2017
MW089674.1	China	2017
MW089687.1	China	2018
MW089688.1	China	2018
MW089689.1	China	2018
MW089690.1	China	2018
MW089691.1	China	2018
MW089701.1	China	2018
MW089708.1	China	2018
MW089711.1	China	2018
MW089712.1	China	2018
MW089713.1	China	2018
MW089723.1	China	2018
MW089724.1	China	2018
MW089727.1	China	2018
MW089728.1	China	2018
MW089729.1	China	2018
MW089738.1	China	2018
MW089739.1	China	2018
MW089740.1	China	2018
OK322701.1	Chile	2020
OK322702.1	Chile	2021
OK322703.1	Chile	2021
OK322704.1	Chile	2021
OK322705.1	Chile	2021
MZ511700.1	Russia	2020
MZ422380.1	Mongolia	2019-01-11
MZ666150.1	CapeVerde	2000
MZ666165.1	CapeVerde	2000
MZ666166.1	DemocraticRepublicoftheCongo	2013
MZ666167.1	DemocraticRepublicoftheCongo	2013
MZ666168.1	DemocraticRepublicoftheCongo	2013
MZ666169.1	Mozambique	2012
MZ666171.1	Nigeria	2015
MZ666172.1	Ethiopia	2014
MZ666174.1	Ethiopia	2014
MZ666175.1	Senegal	2008
MZ666176.1	Senegal	2013
MW974851.1	China	2020-10
MW974858.1	China	2019-06
MZ063698.1	China	2020-10
MT876209.1	China	2019-02
MT876210.1	China	2019-02
MT876211.1	China	2019-02
MT876212.1	China	2019-02
MT876213.1	China	2019-02
MT876214.1	China	2019-02
MZ474503.1	China	2021-03-10
MT711855.1	China	2019-06-10
LC637748.1	Japan	2007-04-03
LC637749.1	Japan	2008-10-29
LC637750.1	Japan	2009-02-18
LC637751.1	Japan	2009-02-18
LC637752.1	Japan	2009-02-18
LC637753.1	Japan	2009-02-18
MT542995.1	China	2018
MT542997.1	China	2017
MT543016.1	China	2017
MT302482.1	China	2018
MT302484.1	China	2016
MT302508.1	China	2018
MT302510.1	China	2016
MT302511.1	China	2017
MT302512.1	China	2017
MT302513.1	China	2019
MT302514.1	China	2019
MT302515.1	China	2017
MT302516.1	China	2017
MT302526.1	China	2018
MT302527.1	China	2018
MT302528.1	China	2019
MW262923.1	Germany	2014
MT814842.1	SouthKorea	2019-10
MT814845.1	SouthKorea	2020-01
MT814847.1	SouthKorea	2020-02
MT184956.1	China	2018
MT184963.1	China	2016
MT184965.1	China	2018
MT184969.1	China	2018
MT184970.1	China	2018
MT185106.1	China	2018
MT185108.1	China	2016
MT185109.1	China	2017
MT185110.1	China	2017
MT185111.1	China	2019
MT185112.1	China	2019
MK006037.1	SouthKorea	2017
MK006038.1	SouthKorea	2017
MN482038.1	China	2019-05
MN482039.1	China	2018-10
MN482040.1	China	2019-05
MN482041.1	China	2018-10
MN482042.1	China	2019-04
MN482043.1	China	2018-09
MN482044.1	China	2018-09
MN482045.1	China	2019-04
MN482048.1	China	2018-09
MN482050.1	China	2019-04
MN482053.1	China	2018-10
MN482056.1	China	2019-05
MT376319.1	SouthKorea	2013
MT376331.1	SouthKorea	2014
MT376337.1	SouthKorea	2014
MT068245.1	Italy	2014-08-26
MT068294.1	Italy	2014
MN258748.1	China	2018-05
MN258761.1	China	2019-06
MN170529.1	China	2018-09-01
MN052980.1	China	2014-02
MN052987.1	China	2017-01
MK599458.1	China	2018
MK139833.1	China	2017
MH920544.1	China	2016
MH920579.1	China	2017
MH920585.1	China	2017
MH920589.1	China	2017
MF737377.1	China	2015-11
MK504382.1	USA	2018
MK504383.1	USA	2018
MK504386.1	USA	2017
MK504396.1	USA	2017
MK504400.1	USA	2018
MK504408.1	USA	2018
MK504415.1	USA	2017
MK604484.1	China	2015
MK604487.1	China	2018
MK604513.1	China	2016
MK424114.1	China	2017
LC383436.1	Japan	2005
LC383437.1	Japan	2006
LC383441.1	Japan	2009
MK050982.1	China	2017
LC433844.1	Japan	2007
MK347366.1	China	2015
MK347370.1	China	2015
MK347374.1	China	2016
MK347380.1	China	2018
MK347381.1	China	2016
MK347388.1	China	2018
MK347399.1	China	2018
MK347400.1	China	2016
MK347405.1	China	2018
MH553305.1	China	2017-08
MH465400.1	China	2016
MH465401.1	China	2016
MH663459.1	China	2015
MH922989.1	China	2018-02
MH922990.1	China	2018-02
MH922991.1	China	2017-09
MH922993.1	China	2017-09
MH656967.1	China	2018
MG732816.1	China	2016
MG732824.1	China	2016
MG732825.1	China	2016
MG807482.1	China	2016-05
MH756606.1	China	2012
MH055411.1	China	2016
MH055412.1	China	2016
MH059556.1	China	2017
MG786933.1	China	2018-01-10
MG798696.1	China	2018-01-10
MH492006.1	China	2012
MG491307.1	China	2016-12-24
MF631830.1	SouthKorea	2015
MF589526.1	China	2014
MF589534.1	China	2014
MF589538.1	China	2017
MF169677.1	Taiwan	2016-05-11
MF679547.1	China	2017
MF679549.1	China	2017
MF679601.1	China	2017
MF326365.1	China	2016-12-11
MF326369.1	China	2016-12-11
MF326372.1	China	2016-12-11
KY612598.1	USA	1998-05-07
KY810321.1	SouthKorea	2016
KY810322.1	SouthKorea	2016
KP420186.1	Ukraine	2011-01
KP420194.1	Ukraine	2011-01
KP420199.1	Ukraine	2012-01
KP420202.1	Ukraine	2012-01
KP420203.1	Ukraine	2012-01
KY940527.1	China	2014-04
KY940529.1	China	2014-04
KY940532.1	China	2013-09
KY940535.1	China	2015-09
MF964235.1	SouthKorea	2004-10-22
MF139056.1	China	1996
MF139057.1	China	1998
MF139058.1	China	1999
MF139059.1	China	1999
MF139060.1	China	1998
MF139061.1	China	1999
MF139062.1	China	1998
MF139063.1	China	1999
MF139064.1	China	1999
MF139065.1	China	1999
MF139066.1	China	1998
MF139067.1	China	1998
MF139068.1	China	1997
MF139069.1	China	1999
MF139070.1	China	1998
MF139071.1	China	1998
MF139072.1	China	1998
MF139073.1	China	1999
MF139074.1	China	1999
MF139075.1	China	1998
MF314196.1	Thailand	2009
MF314202.1	Thailand	2010
MF314203.1	Thailand	2010
MF314204.1	Thailand	2010
MF314205.1	Thailand	2010
MF314206.1	Thailand	2010
MF314227.1	Thailand	2012
KX960927.1	China	2011-06-01
KX960930.1	China	2011-06-01
KX960945.1	China	2013-06-01
KX960946.1	China	2013-06-01
KX960947.1	China	2013-06-01
KX960948.1	China	2013-06-01
KX929000.1	China	2015
KX929002.1	China	2015
KX929003.1	China	2015
KX929017.1	China	2015
KX929019.1	China	2015
KX814347.1	China	2015-10-15
LC310725.1	Japan	2015
LC310729.1	Japan	2015
LC310732.1	Japan	2015
LC310740.1	Japan	2017
KY659550.1	China	2016-12
KY655957.1	China	2013-03
KY655959.1	China	2016-02
KY655960.1	China	2016-02
KY655963.1	China	2016-02
KY655964.1	China	2016-02
KY655965.1	China	2016-02
KY655969.1	China	2016-03
KY655970.1	China	2016-03
KY655971.1	China	2016-01
KY655973.1	China	2016-02
KY655974.1	China	2015-02
KY655981.1	China	2014-04
KY655984.1	China	2014-05
KY655993.1	China	2014-06
KY656000.1	China	2014-08
KY656002.1	China	2014-08
KY656005.1	China	2014-09
KY656008.1	China	2014-10
KY656010.1	China	2014-10
KY656011.1	China	2014-10
KY656015.1	China	2014-10
KY656017.1	China	2014-11
KY656027.1	China	2014-12
KY656033.1	China	2014-12
KY656039.1	China	2014-04
KY656042.1	China	2014-07
KY656043.1	China	2014-07
KY656049.1	China	2015-02
KY656055.1	China	2015-02
KY656057.1	China	2016-02
KY656090.1	China	2016-04
KY656093.1	China	2016-02
KY656105.1	China	2016-04
KY656106.1	China	2016-04
KY347898.1	China	2016
KY388466.1	Germany	2013
KY388467.1	Germany	2013
KY388475.1	Germany	2013
KT819168.1	Brazil	2014
KX352445.1	Germany	2000
KX098668.1	USA	2015-10
KX098673.1	USA	2015-10
KX098675.1	USA	2015-10
KX098682.1	USA	2015-10
KX098689.1	USA	2015-10
KX098694.1	USA	2015-10
KX098695.1	USA	2015-10
KX098717.1	USA	2015-12
KX098734.1	USA	2015-12
KX098741.1	USA	2016-01
KX098742.1	USA	2016-01
KX098748.1	USA	2016-01
KX098762.1	USA	2016-02
KX098768.1	USA	2016-03
KX510064.1	USA	2016-04
KX510071.1	USA	2016-04
KX510074.1	USA	2016-04
KX510075.1	USA	2016-04
KX510076.1	USA	2016-04
KX510085.1	USA	2016-04
KX298473.1	China	2014
KX828213.1	SouthKorea	2012
KX828214.1	SouthKorea	2015
KX828215.1	SouthKorea	2016
KX828216.1	SouthKorea	2016
KX828217.1	SouthKorea	2016
KX828218.1	SouthKorea	2016
KU756238.1	China	2014-07
KU697011.1	USA	2015-02-20
KU697013.1	USA	2015-02-27
KU697021.1	USA	2015-02-27
KU697046.1	USA	2015-02-19
KU697049.1	USA	2015-02-20
KU697052.1	USA	2015-02-20
KU697065.1	USA	2015-02-18
KU697068.1	USA	2015-02-18
KU697071.1	USA	2015-02-13
KU697082.1	USA	2015-02-10
KU697084.1	USA	2014-01
KU697100.1	USA	2014-06
KU697101.1	USA	2014-06
KU697104.1	USA	2014-06
KU697111.1	USA	2014-08
KU697117.1	USA	2014-10
KU697120.1	USA	2014-10
KU697122.1	USA	2014-11
KU697152.1	USA	2015-02
KU697153.1	USA	2015-02
KU697163.1	USA	2015-03
KU697174.1	USA	2015-04
KU697176.1	USA	2015-04
KU697183.1	USA	2015-04
KU697187.1	USA	2015-04
KU697195.1	USA	2015-05
KU697198.1	USA	2015-05
KU697201.1	USA	2015-05
KU697206.1	USA	2015-05
KU697208.1	USA	2015-05
KU697209.1	USA	2015-05
KU697212.1	USA	2015-06
KU697219.1	USA	2015-06
KU697222.1	USA	2015-06
KU697223.1	USA	2015-06
KU697224.1	USA	2015-06
KU697228.1	USA	2015-06
KU697229.1	USA	2015-06
KU697248.1	USA	2015-06
KU697249.1	USA	2015-06
KU697250.1	USA	2015-06
KU697251.1	USA	2015-07
KU697252.1	USA	2015-07
KU697253.1	USA	2015-07
KU697254.1	USA	2015-07
KU697255.1	USA	2015-07
KU697256.1	USA	2015-07
KU697265.1	USA	2015-07
KU697266.1	USA	2015-07
KU697267.1	USA	2015-07
KU697274.1	USA	2015-08
KU697275.1	USA	2015-08
KU697287.1	USA	2015-09
KU697290.1	USA	2015-09
KX169307.1	China	2015-08-27
KX169312.1	China	2015-08-27
KX169324.1	China	2015-10-13
KX169327.1	China	2015-10-13
KX169328.1	China	2015-10-13
KX169330.1	China	2015-10-13
KX169332.1	China	2015-10-13
KX169333.1	China	2015-10-13
KX169334.1	China	2015-10-13
KX352155.1	China	2014-01-12
KX352157.1	China	2015-07-28
KX352158.1	China	2015-08-23
KX068221.1	China	2014-04-23
KM042397.1	VietNam	2008-08-08
KT867839.1	USA	2006
KT867841.1	USA	2006
KT867843.1	USA	2006
KT867844.1	USA	2006
KT867845.1	USA	2006
KT867846.1	USA	2006
KT867847.1	USA	2006
KT867848.1	USA	2007
KT867860.1	USA	2013
KT867862.1	USA	2013
KT867866.1	USA	2006
KT867868.1	USA	2006
KT867869.1	USA	2013
KT867870.1	USA	2006
KT867871.1	USA	2006
KT867875.1	USA	2006
KT867878.1	USA	2006
KT867887.1	USA	2006
KT867890.1	USA	2006
KT867892.1	USA	2006
KT867893.1	USA	2006
KT867897.1	USA	2006
KT867902.1	USA	2006
KT867903.1	USA	2013
KT867906.1	USA	2006
KT867923.1	USA	2013
KT867924.1	USA	2013
KT867925.1	USA	2013
KT867926.1	USA	2013
KT867927.1	USA	2013
KT867928.1	USA	2013
KT867929.1	USA	2013
KT867930.1	USA	2013
KT867931.1	USA	2013
KT867932.1	USA	2013
KT867933.1	USA	2013
KT867934.1	USA	2013
KT867948.1	USA	2006
KT867952.1	USA	2013
KT867953.1	USA	2006
KT867958.1	USA	2006
KT867959.1	USA	2007
KT867979.1	USA	2006
KT867980.1	USA	2006
KT867981.1	USA	2006
KT867986.1	USA	2006
KT867989.1	USA	2006
KT867990.1	USA	2007
KT867992.1	USA	2012
KT867994.1	USA	2007
KT867995.1	USA	2012
KT867997.1	USA	2012
KT867998.1	USA	2012
KT867999.1	USA	2012
KT868000.1	USA	2012
KT868001.1	USA	2012
KT868004.1	USA	2007
KT868008.1	USA	2006
KT868009.1	USA	2006
KT868014.1	USA	2006
KT868023.1	USA	2006
KT868024.1	USA	2006
KT868025.1	USA	2006
KT868027.1	USA	2005
KT868029.1	USA	2011
KT868033.1	USA	2005
KT868034.1	USA	2011
KT868041.1	USA	2006
KT868042.1	USA	2006
KT868044.1	USA	2005
KT868049.1	USA	2012
KT868050.1	USA	2006
KT868051.1	USA	2004
KT868053.1	USA	2006
KT868054.1	USA	2007
KT868058.1	USA	2005
KT868059.1	USA	2007
KT868060.1	USA	2005
KT868063.1	USA	2007
KT868064.1	USA	2005
KT868065.1	USA	2006
KT868069.1	USA	2007
KT868070.1	USA	2005
KT868071.1	USA	2006
KT868080.1	USA	2007
KT868092.1	USA	2007
KT868096.1	USA	2006
KT868097.1	USA	2007
KT868099.1	USA	2006
KT868100.1	USA	2006
KT868102.1	USA	2007
KT868108.1	USA	2006
KT868110.1	USA	2006
KT868111.1	USA	2007
KT868113.1	USA	2007
KT868114.1	USA	2007
KT868115.1	USA	2006
KT868120.1	USA	2007
KT868121.1	USA	2006
KT868122.1	USA	2007
KT868131.1	USA	2006
KT868137.1	USA	2006
KT868138.1	USA	2007
KT868139.1	USA	2006
KT868142.1	USA	2006
KT868144.1	USA	2006
KT868146.1	USA	2007
KT868147.1	USA	2006
KT868152.1	USA	2006
KT868154.1	USA	2006
KT868159.1	USA	2006
KT868160.1	USA	2007
KT868167.1	USA	2006
KT868170.1	USA	2007
KT868171.1	USA	2006
KT868173.1	USA	2006
KT868176.1	USA	2007
KT868184.1	USA	2006
KT868187.1	USA	2006
KT868196.1	USA	2006
KT868197.1	USA	2006
KT868199.1	USA	2006
KT868202.1	USA	2006
KT868204.1	USA	2006
KT868211.1	USA	2006
KT868213.1	USA	2006
KT868214.1	USA	2006
KT868215.1	USA	2006
KT868216.1	USA	2006
KT868217.1	USA	2006
KT868218.1	USA	2006
KT868220.1	USA	2006
KT868225.1	USA	2006
KT868233.1	USA	2006
KT868237.1	USA	2006
KT868239.1	USA	2006
KT868243.1	USA	2006
KT868246.1	USA	2006
KT868247.1	USA	2006
KT868248.1	USA	2006
KT868252.1	USA	2006
KT868254.1	USA	2006
KT868257.1	USA	2006
KT868258.1	USA	2006
KT868260.1	USA	2006
KT868264.1	USA	2006
KT868265.1	USA	2006
KT868266.1	USA	2006
KT868267.1	USA	2006
KT868271.1	USA	2006
KT868272.1	USA	2006
KT868274.1	USA	2006
KT868283.1	USA	2006
KT868285.1	USA	2009
KT868293.1	USA	2006
KT868296.1	USA	2006
KT868302.1	USA	2006
KT868303.1	USA	2006
KT868307.1	USA	2006
KT868310.1	USA	2004
KT868311.1	USA	2004
KT868313.1	USA	2007
KT868314.1	USA	2004
KT868315.1	USA	2005
KT868317.1	USA	2007
KT868318.1	USA	2003
KT868321.1	USA	2007
KT868323.1	USA	2007
KT868327.1	USA	2006
KT868332.1	USA	2005
KT868333.1	USA	2005
KT868334.1	USA	2005
KT868335.1	USA	2005
KT868337.1	USA	2002
KT868343.1	USA	2006
KT868346.1	USA	2006
KT868347.1	USA	2007
KT868348.1	USA	2006
KT868349.1	USA	2006
KT868350.1	USA	2006
KT868355.1	USA	2006
KT868356.1	USA	2006
KT868357.1	USA	2006
KT868358.1	USA	2006
KT868359.1	USA	2006
KT868362.1	USA	2005
KT868365.1	USA	2007
KT868366.1	USA	2005
KT868367.1	USA	2006
KT868368.1	USA	2007
KT868369.1	USA	2013
KT868370.1	USA	2005
KT868371.1	USA	2006
KT868372.1	USA	2007
KT868373.1	USA	2012
KT868374.1	USA	2005
KT868375.1	USA	2006
KT868377.1	USA	2012
KT868378.1	USA	2005
KT868380.1	USA	2007
KT868381.1	USA	2012
KT868382.1	USA	2005
KT868384.1	USA	2012
KT868385.1	USA	2012
KT868388.1	USA	2012
KT868390.1	USA	2012
KT868391.1	USA	2006
KT868392.1	USA	2012
KT868393.1	USA	2012
KT868394.1	USA	2012
KT868395.1	USA	2012
KT868396.1	USA	2012
KT868397.1	USA	2012
KT868398.1	USA	2012
KT868399.1	USA	2012
KT868400.1	USA	2012
KT868401.1	USA	2012
KT868402.1	USA	2012
KT868403.1	USA	2012
KT868404.1	USA	2012
KT868405.1	USA	2012
KT868406.1	USA	2012
KT868407.1	USA	2012
KT868408.1	USA	2012
KT868409.1	USA	2012
KT868410.1	USA	2012
KT868411.1	USA	2012
KT868412.1	USA	2012
KT868413.1	USA	2012
KT868418.1	USA	2009
KT868422.1	USA	2006
KT868423.1	USA	2006
KT868425.1	USA	2006
KT868430.1	USA	2003
KT868433.1	USA	2006
KT868435.1	USA	2012
KT868436.1	USA	2013
KT868437.1	USA	2006
KT868440.1	USA	2012
KT868447.1	USA	2006
KT868452.1	USA	2008
KT868456.1	USA	2006
KT868463.1	USA	2007
KT868464.1	USA	2007
KT868467.1	USA	2007
KT868479.1	USA	2008
KT868482.1	USA	2008
KT868484.1	USA	2007
KT868489.1	USA	2006
KT868491.1	USA	2008
KT868492.1	USA	2006
KT868503.1	USA	2006
KT868504.1	USA	2006
KT868513.1	USA	2006
KT868515.1	USA	2006
KT284886.1	China	2015-06
KT284887.1	China	2015-06
KT284888.1	China	2015-05
KT284889.1	China	2015-05
KR058357.1	China	2014-06-25
KP081543.1	China	2013-12-11
KP081549.1	China	2014-06-02
KP081551.1	China	2014-07-22
KP670420.1	China	2013
KP768467.1	Slovakia	2012-03-13
KP768474.1	Slovakia	2012-04-15
KP768480.1	Slovakia	2012-05-05
KJ094600.1	Brazil	2010
KJ094601.1	Brazil	2010
KJ094603.1	Brazil	2010
KP231099.1	Italy	2008-03-18
KP231100.1	Italy	2010-04-07
KP231101.1	Italy	2012-02-22
KP245929.1	China	2013
KP112485.1	China	2014-07-17
KM924364.1	SouthKorea	2012-03
KM924366.1	SouthKorea	2012-03
KC514989.1	China	2012
KC514996.1	China	2012
KC515002.1	China	2012
KC515024.1	China	2012
KC515025.1	China	2012
KM880087.1	China	2014-04-25
KM880088.1	China	2014-04-25
KM880089.1	China	2014-04-25
KM360057.1	China	2013-05-16
LC004734.1	India	2013-06-14
KM190985.1	USA	2012
KM190998.1	USA	2012
KM191010.1	USA	2012-07
KM191038.1	USA	2011-03
KM191039.1	USA	2011-03
KM191040.1	USA	2011-03
KM191041.1	USA	2011-03
KM191054.1	USA	2013-04
KM191069.1	USA	2013-05
KM191082.1	USA	2013-04
KM191107.1	USA	2013-11
KM191109.1	USA	2013-11
KM191112.1	USA	2013-08
KM191113.1	USA	2013-11
KM191114.1	USA	2013-09
KM191118.1	USA	2013-10
KM191122.1	USA	2013-11
KM191123.1	USA	2013-08
KM191127.1	Mexico	2011-09
KM191128.1	Mexico	2011-09
KM116515.1	China	2013-09
KM067385.1	China	2014-01-03
KM035762.1	China	2014-05-06
KJ729073.1	India	2012-04-24
KJ680365.1	China	2012-05-04
KC620521.1	SouthKorea	1999
KC620522.1	SouthKorea	2000
KC620523.1	SouthKorea	2000
KC620524.1	SouthKorea	2000
KC620525.1	SouthKorea	2001
KC620526.1	SouthKorea	2001
KC620527.1	SouthKorea	2001
KC620528.1	SouthKorea	2001
KC620529.1	SouthKorea	2002
KC620530.1	SouthKorea	2003
KC620531.1	SouthKorea	2004
KC620532.1	SouthKorea	2004
KF850458.1	China	2009-10-02
KF850466.1	China	2011-04-02
KF850468.1	China	2011-05-02
KF027495.1	China	2012
KC702785.1	USA	2012-02-12
KC702786.1	USA	2012-02-12
KC699529.1	USA	2012-02-12
KC618389.1	USA	2008
KC800634.1	China	2010-05-21
KC800635.1	China	2011-10-12
KC800636.1	China	2012-03-16
JX512854.1	Switzerland	2000
KC188796.1	SouthKorea	2012-01-01
JX982223.1	China	2011-04-13
JX982225.1	China	2011-11-15
JX948774.1	China	2011-02-16
JQ994269.1	Canada	2007
JQ806749.1	China	2010
JN639856.1	China	2011-06-20
JN133304.1	Spain	2002
JN133305.1	Slovakia	2009
JF683387.1	Taiwan	2002-02
JF683388.1	Taiwan	2003-02
JF683391.1	Taiwan	2003-04
JF683398.1	Taiwan	2007-03
JF683403.1	Taiwan	2007-10
JF927978.1	Taiwan	2002-03
JF927979.1	Taiwan	2002-04
JF682791.1	China	2010
JF682793.1	China	2011
JF682794.1	China	2011
JN382157.1	Romania	2011-02-20
JN382161.1	Romania	2011-02-20
JN382162.1	Romania	2011-02-20
JN382177.1	Romania	2011-02-20
JF317582.1	SouthKorea	2009
JF317584.1	SouthKorea	2010
JF317589.1	SouthKorea	2010
HQ591366.1	Croatia	2008
HQ591374.1	Croatia	2008
JF928003.1	China	2011-03-19
JN006465.1	Romania	2010
HQ831519.1	Portugal	2008-03-18
HQ831520.1	Portugal	2008-02-08
HQ831522.1	Portugal	2008-02-22
HQ831533.1	Portugal	2007-11-08
HQ831536.1	Portugal	2008-03-13
HQ831539.1	Portugal	2009-05-03
HQ402903.1	China	2008-01-05
HQ378164.1	Serbia	2009-04-27
HQ378165.1	Serbia	2009-06-24
HQ378166.1	Serbia	2010-09-15
GU049340.1	Canada	2007
HM009337.1	Slovakia	2005
HM038033.1	China	2007-12-02
HM038034.1	China	2008-05-11
HM000100.2	SouthKorea	2010-02-04
GQ404853.1	USA	2006
GU370063.1	China	2009-06-25
GU370064.1	China	2009-06-25
AB512125.1	Japan	2007-12
AB512126.1	Japan	2007-12
AB512127.1	Japan	2007-12
AB512128.1	Japan	2007-12
AB512129.1	Japan	2007-12
AB512130.1	Japan	2007-12
GU001709.1	China	2009-07-28
GQ358993.1	China	2007-05-10
GQ359003.1	China	2008-10-28
FJ905471.1	SouthKorea	2007
FJ870967.1	China	2008
FJ870968.1	China	2008
FJ501957.1	China	2007-09-16
FJ218001.1	USA	2006-02
FJ218002.1	USA	2006-02
FJ660969.1	China	2007-04-21
FJ483938.1	China	2005-09-01
FJ233908.1	Canada	2007-05
FJ233909.1	Canada	2007-05
AB361568.1	Japan	2006-11-01
AB361570.1	Japan	2006-11-03
AB361571.1	Japan	2007-05-11
AB361572.1	Japan	2006-11-23
AB361573.1	Japan	2007-05-14
AB361574.1	Japan	2006-11-09
AB361576.1	Japan	2006-11-16
AB361577.1	Japan	2007-06-12
AB361582.1	Japan	2006-09-09
AB361583.1	Japan	2007-05-01
EU747125.1	SouthKorea	2007-10-18
PP993529.1	VietNam	2022
PP993535.1	VietNam	2022
PP993542.1	VietNam	2023
PP993543.1	VietNam	2023
PP993544.1	VietNam	2023
PP993545.1	VietNam	2023
PP993550.1	VietNam	2022
PP927778.1	China	2024-05-12
PP927781.1	China	2024-05-12
PP927785.1	China	2024-05-12
PP927789.1	China	2024-05-12
PP927794.1	China	2024-05-12
PP927797.1	China	2024-05-12
PP927809.1	China	2024-05-12
PP927810.1	China	2024-05-12
PP927811.1	China	2024-05-12
PP927812.1	China	2024-05-12
PP927816.1	China	2024-05-12
OR960656.1	Russia	2021-12-04
OR960658.1	Russia	2021-12-26
OR966782.1	Italy	2023-01-21
OR966784.1	Italy	2023-01-07
PP707852.1	China	2022-10-27
PP707854.1	China	2023-03-05
PP707855.1	China	2023-07-21
PP541472.1	China	2023
OR478979.1	Portugal	2000
OR478980.1	Portugal	2001
PP179082.1	China	2023
PP179084.1	China	2023
PP179085.1	China	2023
PP179092.1	China	2023
PP179093.1	China	2023
PP179103.1	China	2023
PP179104.1	China	2023
PP179105.1	China	2023
PP179107.1	China	2023
PP179118.1	China	2023
PP179124.1	China	2023
PP179131.1	China	2023
PP179136.1	China	2023
PP179138.1	China	2023
PP179139.1	China	2023
PP179145.1	China	2023
PP158532.1	China	2016
PP158534.1	China	2016
PP158536.1	China	2016
PP158541.1	China	2015
PP035179.1	China	2021
PP035181.1	China	2021
PP035182.1	China	2021
PP035183.1	China	2021
PP035184.1	China	2021
PP035185.1	China	2021
OR790915.1	China	2022-05-23
OR790920.1	China	2021-06-14
OR790922.1	China	2021-09-17
OR790924.1	China	2020-09-02
OR790925.1	China	2020-08-11
OR785790.1	China	2022-05-23
OR785791.1	China	2022-07-08
OR785795.1	China	2021-06-14
OR785797.1	China	2021-09-17
OR785799.1	China	2020-09-02
OR785800.1	China	2020-08-11
OR684453.1	China	2023
OR591986.1	Ukraine	2019
OR591988.1	Ukraine	2019
OR591989.1	Ukraine	2019
OR591991.1	Ukraine	2019
OR591993.1	Ukraine	2019
OR591995.1	Ukraine	2012
OR591997.1	Ukraine	2012
OR591998.1	Ukraine	2012
OR592000.1	Ukraine	2012
OR592001.1	Ukraine	2012
OR592002.1	Ukraine	2012
OR592003.1	Ukraine	2012
OR592004.1	Ukraine	2012
OR592005.1	Ukraine	2012
OR592007.1	Ukraine	2012
OR537632.1	China	2017
OR537633.1	China	2017
OR537636.1	China	2017
OR537646.1	China	2017
OR537647.1	China	2017
OR537648.1	China	2017
OR537649.1	China	2017
OR537650.1	China	2017
OR537653.1	China	2017
OR537654.1	China	2017
OR537655.1	China	2017
OR537659.1	China	2018
OR537661.1	China	2018
OR537667.1	China	2018
OR537668.1	China	2018
OR537670.1	China	2018
OR537672.1	China	2018
OR537678.1	China	2018
OR537679.1	China	2018
OR537683.1	China	2019
OR537685.1	China	2019
OR537692.1	China	2019
OR537693.1	China	2019
OR533427.1	China	2015
OR533429.1	China	2015
OR533436.1	China	2016
OR533439.1	China	2016
OR533440.1	China	2016
OR533442.1	China	2016
OR533446.1	China	2015
OR533452.1	China	2015
OR533453.1	China	2015
OR533454.1	China	2015
OR533459.1	China	2015
OR533463.1	China	2015
OR533466.1	China	2015
OR533467.1	China	2015
OR533471.1	China	2014
OR533477.1	China	2014
OR533479.1	China	2014
OR533480.1	China	2014
OR533481.1	China	2014
OR533482.1	China	2014
OR542932.1	China	2019
OR542937.1	China	2020
OR542945.1	China	2021
OR542946.1	China	2021
OR542947.1	China	2021
OR542950.1	China	2021
OR567167.1	China	2015
OR567168.1	China	2015
OR567169.1	China	2017
OR567170.1	China	2017
OR567171.1	China	2015
OR567173.1	China	2016
OR567178.1	China	2015
OR567179.1	China	2015
OR567180.1	China	2015
OR567181.1	China	2015
OR567183.1	China	2015
OR567184.1	China	2015
OR567190.1	China	2017
OR567191.1	China	2017
OR567192.1	China	2017
OR567193.1	China	2017
OR567207.1	China	2017
OR567208.1	China	2017
OR567209.1	China	2017
OR567210.1	China	2017
OR567211.1	China	2017
OR567212.1	China	2017
OR567214.1	China	2017
OR567215.1	China	2017
OR567216.1	China	2017
OR567217.1	China	2017
OR567218.1	China	2017
OR567219.1	China	2017
OR567225.1	China	2018
OR567226.1	China	2018
OR567228.1	China	2018
OR567234.1	China	2019
OR567235.1	China	2019
OR567241.1	China	2021
OR553625.1	China	2015
OR553626.1	China	2015
OR553627.1	China	2015
OR553644.1	China	2016
OR553645.1	China	2017
OR553646.1	China	2017
OR480432.1	China	2018-03-12
OR480433.1	China	2018-04-08
OR480434.1	China	2018-03-12
OR480435.1	China	2020-09-26
OR480436.1	China	2020-10-05
OR480437.1	China	2022-02-24
OR480438.1	China	2022-02-24
OR480439.1	China	2022-03-05
OR519951.1	Italy	2021
OR197718.1	China	2023-05-28
MZ606287.1	China	2018
MZ606289.1	China	2018
MZ606292.1	China	2018
MZ606294.1	China	2018
MZ606297.1	China	2018
MZ606298.1	China	2018
MZ606302.1	China	2018
MZ606303.1	China	2018
MZ606305.1	China	2018
MZ606307.1	China	2018
MZ606308.1	China	2018
MZ606309.1	China	2018
MZ606310.1	China	2018
MZ606311.1	China	2018
MZ606313.1	China	2019
MZ606317.1	China	2019
MZ606320.1	China	2019
MZ606321.1	China	2019
MZ606322.1	China	2019
MZ606326.1	China	2019
MZ606327.1	China	2019
MZ606328.1	China	2019
MZ606335.1	China	2019
MZ606342.1	China	2019
MZ606347.1	China	2019
MZ606350.1	China	2019
MZ606353.1	China	2020
MZ606358.1	China	2019
MZ606359.1	China	2019
MZ606360.1	China	2019
MZ606363.1	China	2020
MZ615666.1	China	2018
MZ615669.1	China	2018
MZ615670.1	China	2018
MZ615671.1	China	2018
MZ615672.1	China	2018
MZ615674.1	China	2019
MZ615675.1	China	2019
OQ784907.1	VietNam	2022-08
OQ784909.1	VietNam	2022-08
OQ749408.1	China	2020-04-16
OQ749409.1	China	2020-08-27
OQ749410.1	China	2020-10-11
OQ749411.1	China	2020-10-14
OQ749412.1	China	2020-10-28
OQ749414.1	China	2020-11-11
OQ749415.1	China	2020-11-18
OQ749428.1	China	2022-06-04
OQ749429.1	China	2022-09-30
OQ749432.1	China	2022-12-04
OR114687.1	China	2023-03-20
OQ241217.1	Canada	2022
OQ291187.1	China	2021-05-01
OP899456.1	Italy	2022-01-10
OP899490.1	Italy	2019
OP899507.1	Italy	2021
OP455991.1	India	2021
OP374024.1	China	2022-05
ON862501.1	China	2021
ON862502.1	China	2017
ON862503.1	China	2017
ON862504.1	China	2017
ON862505.1	China	2017
ON862506.1	China	2016
ON862507.1	China	2016
ON862515.1	China	2017
ON862516.1	China	2017
ON862517.1	China	2017
ON862518.1	China	2017
ON862519.1	China	2017
ON862520.1	China	2017
ON862521.1	China	2017
ON862522.1	China	2017
ON862523.1	China	2017
ON862524.1	China	2017
ON862525.1	China	2017
ON862526.1	China	2017
ON862527.1	China	2017
ON862528.1	China	2017
ON862530.1	China	2017
ON862531.1	China	2017
ON862532.1	China	2021
ON862541.1	China	2021
ON862542.1	China	2021
OM818368.1	Italy	2021
OP806267.1	SouthKorea	2020-12-01
ON248866.1	China	2022-01-10
ON248868.1	China	2022-02-11
ON248871.1	China	2022-02-23
OQ168431.1	China	2020
OM274022.1	China	2020
OM274023.1	China	2020
OM274024.1	China	2020
OM858856.1	China	2021
MW369443.1	Brazil	2020
OM288649.1	China	2019
OM288653.1	China	2019
OM288654.1	China	2019
OM288655.1	China	2019
OM288656.1	China	2019
OM288659.1	China	2019
OM288660.1	China	2019
OP055741.1	China	2020-12-09
OP055743.1	China	2021-04-17
OP055744.1	China	2021-06-14
OP055745.1	China	2021-10-10
OP055747.1	China	2021-05-03
MZ593750.1	China	2021
MZ593752.1	China	2021
MZ593760.1	China	2021
MZ593766.1	China	2020
MZ593767.1	China	2020
OL677581.1	Thailand	2019-12-13
OL677583.1	Thailand	2019-07-10
OL677588.1	Thailand	2019-08-14
OL677590.1	Thailand	2019-01-16
OL677598.1	Thailand	2019-08-25
OL677600.1	Thailand	2019-09-17
OL677614.1	Thailand	2020-11-09
MZ747113.1	China	2018
MZ747115.1	China	2018
MZ747116.1	China	2018
MZ747117.1	China	2018
MZ747118.1	China	2019
MZ747119.1	China	2019
MZ747120.1	China	2019
MZ747121.1	China	2019
MZ667317.1	China	2017-02-21
MZ667318.1	China	2016-02-22
MZ667319.1	China	2016-02-23
MZ667320.1	China	2015-02-24
MZ667321.1	China	2017-02-25
MZ667325.1	China	2015-03-01
ON012605.1	China	2021
ON012608.1	China	2021
ON262086.1	China	2021-03-25
ON262089.1	China	2021-01-22
ON262092.1	China	2021-10-09
ON262096.1	China	2021-12-02
ON262100.1	China	2021-09-12
MZ403749.1	China	2018-06
MZ605281.1	China	2020-11-27
ON098575.1	Nigeria	2014-02
ON098576.1	Nigeria	2020-05
OP263039.1	China	2019-12-18
OP263045.1	China	2019-11-24
OP263056.1	China	2021-12-09
OP263058.1	China	2021-04-18
OP263063.1	China	2021-05-03
OP263065.1	China	2022-05-15
OP263069.1	China	2022-03-09
MZ151441.1	China	2018
OL310716.1	China	2021-10
MW574959.1	China	2019
MW574960.1	China	2019
MW574963.1	China	2019
ON012566.1	China	2021-07-13
OL452025.1	China	2019
OL452026.1	China	2020
MZ995473.1	China	2017
MZ995478.1	China	2018
MZ995480.1	China	2018
MZ440696.1	SouthKorea	2021
MW804285.1	China	2020
MW653451.1	China	2020-09
MW653452.1	China	2020-09
MW974867.1	China	2018
MW974868.1	China	2019
MW974869.1	China	2020
MW974870.1	China	2018
MW974871.1	China	2019
MW974872.1	China	2020
MW582525.1	China	2019
MW561981.1	China	2019
MW561982.1	China	2019
MW561986.1	China	2019
MW561987.1	China	2019
MW561990.1	China	2019
MW561991.1	China	2019
MW561995.1	China	2020
OK334635.1	China	2021
OL376988.1	USA	2017
OL376995.1	USA	2017
OL377006.1	USA	2017
OL377009.1	USA	2017
OL377028.1	USA	2017
OL377029.1	USA	2017
OL377038.1	USA	2017
OL377041.1	USA	2017
OL377044.1	USA	2017
OL377056.1	USA	2017
OL377058.1	USA	2017
OL377086.1	USA	2018
OL377093.1	USA	2018
OL377105.1	USA	2018
OL377106.1	USA	2018
OL377150.1	USA	2018
OL377157.1	USA	2018
OL377168.1	USA	2018
OL377180.1	Brazil	2019
OL377181.1	Brazil	2019
OL377182.1	Brazil	2019
OL377184.1	Brazil	2019
OL377189.1	Brazil	2019
OL377190.1	Brazil	2019
OL377192.1	Brazil	2019
OL377193.1	Brazil	2019
OL377194.1	Brazil	2019
OL377229.1	France	2018
OL377230.1	France	2018
OL377235.1	France	2019
OL377238.1	France	2019
OL377240.1	France	2019
OL377242.1	France	2019
OL377243.1	France	2019
OL377246.1	France	2019
OL377247.1	France	2019
OL377248.1	France	2019
OL377253.1	France	2019
OL377254.1	France	2019
OL377256.1	France	2019
OL377260.1	Italy	2019
OL377261.1	Italy	2019
OL377262.1	Italy	2019
OL377263.1	Italy	2019
OL377264.1	Poland	2017
OL377265.1	Poland	2017
OL377266.1	Poland	2017
OL377267.1	Poland	2017
OL377268.1	Poland	2017
OL377281.1	Poland	2017
OL377282.1	Poland	2017
OL377295.1	Russia	2020
OL377296.1	Russia	2020
OL377297.1	Russia	2020
OL377303.1	UnitedKingdom	2018
OL377304.1	UnitedKingdom	2019
OL377305.1	UnitedKingdom	2019
OL377310.1	UnitedKingdom	2018
OL377313.1	UnitedKingdom	2018
OL377314.1	Chile	2020
OL377316.1	Chile	2020
OL377317.1	Chile	2020
OL377323.1	Belgium	2019
OL377331.1	Netherlands	2019
OL377335.1	France	2019
OL377338.1	France	2020
OL377342.1	France	2020
OL377344.1	France	2020
OL377348.1	France	2020
OL377360.1	Germany	2019
OL377361.1	Germany	2019
OL377362.1	Germany	2018
OL377363.1	Germany	2018
OL377364.1	Germany	2018
OL377365.1	Germany	2018
OL377366.1	Germany	2018
OL377386.1	Poland	2020
OL377389.1	Poland	2020
OL377418.1	Thailand	2020
OL377450.1	Denmark	2020
OL377452.1	Denmark	2020
OL377453.1	Denmark	2020
OL377454.1	Denmark	2020
OL377458.1	Denmark	2020
OL377464.1	Denmark	2020
OL377467.1	Denmark	2020
OL377468.1	Denmark	2020
OL377469.1	France	2019
OL377472.1	France	2020
OL377488.1	France	2020
OL377489.1	France	2020
OL377491.1	France	2020
OL377508.1	Japan	2018
OL377557.1	VietNam	2018
OL377558.1	VietNam	2019
OL377559.1	VietNam	2019
OL377560.1	VietNam	2019
OL377561.1	VietNam	2019
OL377605.1	Japan	2020
OL377623.1	Japan	2020
OL377648.1	Japan	2020
OL377687.1	France	2020
OL377690.1	France	2021
OL377691.1	France	2021
OL377692.1	France	2021
OL377700.1	France	2021
OL377701.1	France	2021
OL377704.1	Germany	2021
MW423632.1	China	2020-12
MW423633.1	China	2020-11
MW423635.1	China	2020-04
MW889012.1	China	2020
MW889013.1	China	2020
MW889014.1	China	2020
MW889015.1	China	2020
MW889016.1	China	2020
MW889017.1	China	2020
MW889018.1	China	2020
MW889019.1	China	2020
MW889020.1	China	2020
MW889022.1	China	2020
MW889023.1	China	2020
MW889024.1	China	2020
MW889025.1	China	2020
MW889026.1	China	2020
MW889027.1	China	2020
MW889028.1	China	2020
MW889029.1	China	2020
MW889030.1	China	2020
MW889031.1	China	2020
MW889032.1	China	2020
MW889033.1	China	2020
MW889034.1	China	2020
MW889035.1	China	2020
MW889036.1	China	2020
MW889037.1	China	2020
MW889038.1	China	2020
MW889039.1	China	2020
OM417559.1	Namibia	2021
OM417560.1	Namibia	2021
MZ954880.1	VietNam	2007
MZ954881.1	VietNam	2007
MZ954883.1	VietNam	2009
MZ954884.1	VietNam	2009
MZ954885.1	VietNam	2009
MZ954886.1	VietNam	2009
MZ954887.1	VietNam	2009
MZ954888.1	VietNam	2009
MZ954889.1	VietNam	2009
MZ954890.1	VietNam	2010
MZ954892.1	VietNam	2010
MZ954895.1	VietNam	2010
MZ954896.1	VietNam	2010
MZ954897.1	VietNam	2012
MZ954906.1	VietNam	2013
MZ954907.1	VietNam	2013
MZ954909.1	VietNam	2013
MZ954911.1	VietNam	2013
MZ954912.1	VietNam	2013
MZ954914.1	VietNam	2014
MZ954915.1	VietNam	2014
MZ954916.1	VietNam	2014
MZ954921.1	VietNam	2015
MZ954927.1	VietNam	2016
OK170038.1	China	2021-08
OK170039.1	China	2021-08
OK572465.1	China	2021-09
OK572466.1	China	2021-09
OL438911.1	China	2021-09
MW089628.1	China	2016
MW089629.1	China	2016
MW089630.1	China	2016
MW089631.1	China	2016
MW089636.1	China	2016
MW089639.1	China	2016
MW089640.1	China	2016
MW089648.1	China	2016
MW089653.1	China	2016
MW089655.1	China	2017
MW089656.1	China	2017
MW089665.1	China	2017
MW089677.1	China	2018
MW089678.1	China	2018
MW089685.1	China	2018
MW089686.1	China	2018
MW089702.1	China	2018
MW089730.1	China	2018
OK322710.1	Chile	2020
OK322711.1	Chile	2020
OK322712.1	Chile	2020
MZ511695.1	Russia	2020
MZ422383.1	Mongolia	2019-01-11
MZ422384.1	Indonesia	2020-01
MW853936.1	China	2018
MW853938.1	China	2018
MW853939.1	China	2018
MW853940.1	China	2018
MW853941.1	China	2018
MW853942.1	China	2018
MZ666170.1	Mozambique	2013
MZ666173.1	Ethiopia	2014
MW974836.1	China	2019-05
MW974838.1	China	2019-06
MW974839.1	China	2019-08
MW974843.1	China	2019-05
MW974848.1	China	2019-05
MW974849.1	China	2019-06
MW974852.1	China	2019-10
MW974853.1	China	2019-10
MW974854.1	China	2019-10
MW974856.1	China	2019-09
MW974857.1	China	2019-07
MW974859.1	China	2019-07
MW974864.1	China	2019-05
MW974865.1	China	2019-05
MW974866.1	China	2019-05
MZ063699.1	China	2019-06
MZ063700.1	China	2019-07
MZ063701.1	China	2019-10
MZ063702.1	China	2019-10
MZ063704.1	China	2019-05
MZ063705.1	China	2019-06
MZ063706.1	China	2019-06
MW265918.2	VietNam	2019
MW303942.2	VietNam	2018
MW303952.2	VietNam	2018
MW303954.2	VietNam	2019
MW303955.2	VietNam	2018
MW241602.2	VietNam	2019
MW241604.2	VietNam	2018
MW241609.2	VietNam	2018
MW241610.2	VietNam	2018
MW241611.2	VietNam	2019
MZ955993.1	India	2021
MW819708.1	China	2019-10-25
MW819709.1	China	2019-10-25
MW819711.1	China	2019-07-18
MZ474496.1	China	2020-10-25
MZ474497.1	China	2020-10-25
MZ474498.1	China	2019-06-24
MW820682.1	China	2018-06-07
MW820687.1	China	2018-05-17
MW820688.1	China	2018-05-19
MW820690.1	China	2019-01-07
LC637754.1	Japan	2012-04-13
MT542989.1	China	2018
MT542996.1	China	2018
MT543001.1	China	2017
MT543003.1	China	2018
MT543004.1	China	2015
MT543017.1	China	2018
MT543018.1	China	2018
MT543019.1	China	2018
MT543020.1	China	2016
MT302402.1	China	2018
MT302404.1	China	2018
MT302405.1	China	2018
MT302406.1	China	2018
MT302414.1	China	2018
MT302416.1	China	2018
MT302418.1	China	2018
MT302421.1	China	2018
MT302429.1	China	2018
MT302430.1	China	2018
MT302432.1	China	2018
MT302437.1	China	2017
MT302438.1	China	2016
MT302439.1	China	2016
MT302440.1	China	2016
MT302441.1	China	2016
MT302442.1	China	2016
MT302443.1	China	2018
MT302445.1	China	2018
MT302451.1	China	2018
MT302452.1	China	2016
MT302454.1	China	2018
MT302455.1	China	2018
MT302457.1	China	2018
MT302458.1	China	2018
MT302460.1	China	2018
MT302461.1	China	2018
MT302464.1	China	2018
MT302465.1	China	2018
MT302471.1	China	2017
MT302472.1	China	2017
MT302475.1	China	2017
MT302477.1	China	2016
MT302478.1	China	2016
MT302479.1	China	2016
MT302480.1	China	2016
MT302481.1	China	2016
MT302486.1	China	2018
MT302506.1	China	2018
MT302507.1	China	2018
MW262924.1	Germany	2014
MW297157.1	Namibia	2019-09
MW297158.1	Namibia	2019-09
MW297159.1	Namibia	2019-09
MW297160.1	Namibia	2019-09
MW297161.1	Namibia	2019-09
MW297162.1	Namibia	2019-11
MW297163.1	Namibia	2019-11
MT814849.1	SouthKorea	2020-03
MT814850.1	SouthKorea	2020-03
MT505399.1	Argentina	2014
MT505400.1	Argentina	2014
MT505401.1	Argentina	2014
MT505404.1	Argentina	2014
MT505405.1	Argentina	2014
MT505406.1	Argentina	2014
MT505407.1	Argentina	2014
MT184954.1	China	2018
MT184975.1	China	2019
MT184992.1	China	2017
MT185025.1	China	2016
MT185039.1	China	2018
MT185040.1	China	2017
MT185041.1	China	2017
MT185042.1	China	2017
MT185043.1	China	2017
MT185044.1	China	2016
MT185045.1	China	2016
MT185046.1	China	2016
MT185047.1	China	2016
MT185048.1	China	2016
MT185049.1	China	2016
MT185051.1	China	2016
MT185052.1	China	2016
MT185053.1	China	2016
MT185055.1	China	2018
MT185056.1	China	2018
MT185058.1	China	2018
MT185059.1	China	2018
MT185061.1	China	2018
MT185062.1	China	2018
MT185065.1	China	2018
MT185066.1	China	2018
MT185072.1	China	2017
MT185073.1	China	2017
MT185076.1	China	2017
MT185078.1	China	2016
MT185079.1	China	2016
MT185080.1	China	2016
MT185081.1	China	2016
MT185082.1	China	2016
MT185084.1	China	2018
MT185104.1	China	2018
MT185105.1	China	2018
MT432463.1	VietNam	2018-10-31
MT432464.1	VietNam	2019-01-28
MT432465.1	VietNam	2019-12-24
MT432466.1	VietNam	2018-07-31
MT432467.1	VietNam	2019-03-06
MT498553.1	Mexico	2012-02
MT498560.1	Mexico	2012-03
MT498561.1	Mexico	2012-03
MT498565.1	Mexico	2012-05
MT498568.1	Mexico	2013-10
MT498569.1	Mexico	2014-12
MT498575.1	Mexico	2014-02
MW117136.1	China	2018
MW217511.1	China	2020-06
MT423827.1	China	2017
MK006039.1	SouthKorea	2018
MN482037.1	China	2018-09
MN482046.1	China	2019-04
MN482047.1	China	2019-04
MN482049.1	China	2019-04
MN482054.1	China	2019-04
MN482057.1	China	2018-10
MN482058.1	China	2019-04
MN935167.1	SaintKittsandNevis	2015
MN935168.1	SaintKittsandNevis	2015
MN935169.1	SaintKittsandNevis	2015
MN935170.1	SaintKittsandNevis	2015
MN935171.1	SaintKittsandNevis	2015
MN935172.1	SaintKittsandNevis	2015
MN935174.1	SaintKittsandNevis	2015
MN935175.1	SaintKittsandNevis	2012
MN935176.1	SaintKittsandNevis	2012
MN935177.1	SaintKittsandNevis	2012
MN935178.1	SaintKittsandNevis	2013
MN935179.1	SaintKittsandNevis	2013
MN935180.1	SaintKittsandNevis	2013
MN935181.1	SaintKittsandNevis	2013
MN935182.1	SaintKittsandNevis	2013
MN935183.1	SaintKittsandNevis	2013
MN539518.1	China	2019
MN539522.1	China	2019
MT376301.1	SouthKorea	2017
MT376303.1	SouthKorea	2014
MT376307.1	SouthKorea	2015
MT376309.1	SouthKorea	2014
MT376330.1	SouthKorea	2014
MT376333.1	SouthKorea	2014
MT376339.1	SouthKorea	2017
MT376355.1	SouthKorea	2014
MT376360.1	SouthKorea	2017
MT376372.1	SouthKorea	2016
MT376375.1	SouthKorea	2015
MT376376.1	SouthKorea	2014
MT376377.1	SouthKorea	2014
MT376378.1	SouthKorea	2014
MT376379.1	SouthKorea	2014
MH341482.1	China	2014-12-26
MH341483.1	China	2015-04-28
MH341487.1	China	2015-10-22
MH341488.1	China	2015-11-03
MH341489.1	China	2015-10-17
MH341495.1	China	2015-11-18
MH341496.1	China	2015-11-11
MH341498.1	China	2015-05-09
MH341499.1	China	2015-04-10
MH341500.1	China	2014-11-20
MT104511.1	China	2018-03-13
MT104512.1	China	2018-07-15
MT104513.1	China	2018-07-19
MT104514.1	China	2017-12-06
MT068215.1	Italy	2014-01-16
MT068218.1	Italy	2017-03-01
MT068226.1	Italy	2014-05-27
MT068227.1	Italy	2014-05-27
MT068229.1	Italy	2017-05-18
MT068231.1	Italy	2014-08-11
MT068232.1	Italy	2014-08-11
MT068233.1	Italy	2015-07-24
MT068236.1	Italy	2015-08-24
MT068237.1	Italy	2015-09-01
MT068239.1	Italy	2016-10-05
MT068240.1	Italy	2015-10-05
MT068241.1	Italy	2013-12-13
MT068242.1	Italy	2014-12-18
MT068243.1	Italy	2015-11-10
MT068244.1	Italy	2015-11-24
MT068246.1	Italy	2017-01-19
MT068248.1	Italy	2017-04-11
MT068249.1	Italy	2017-04-11
MT068252.1	Italy	2017-05-06
MT068253.1	Italy	2017-05-08
MT068254.1	Italy	2017-05-11
MT068256.1	Italy	2017-05-18
MT068258.1	Italy	2016-05-13
MT068261.1	Italy	2014-08-11
MT068262.1	Italy	2015-07-08
MT068263.1	Italy	2015-02-27
MT068264.1	Italy	2013-10-25
MT068265.1	Italy	2015-09-07
MT068266.1	Italy	2015-09-23
MT068268.1	Italy	2013-12-13
MT068269.1	Italy	2014-10-13
MT068274.1	Italy	2016-11-09
MT068275.1	Italy	2016-11-10
MT068276.1	Italy	2015-11-10
MT068278.1	Italy	2016-12-19
MT068279.1	Italy	2016-12-21
MT068280.1	Italy	2017-01-19
MT068284.1	Italy	2017
MT068285.1	Italy	2017
MT068286.1	Italy	2017
MT068287.1	Italy	2014
MT068289.1	Italy	2014
MT068291.1	Italy	2014
MT068292.1	Italy	2014
MT068293.1	Italy	2014
MT068295.1	Italy	2014
MN258745.1	China	2017-08
MN258752.1	China	2018-10
MN258753.1	China	2018-12
MN170517.1	China	2018-09-01
MN170518.1	China	2018-09-01
MN170519.1	China	2018-09-01
MN170520.1	China	2018-09-01
MN170525.1	China	2018-09-01
MN170526.1	China	2018-09-01
MN196673.1	China	2019-03-03
MN052964.1	China	2016-01
MN052965.1	China	2016-02
MN052966.1	China	2016-06
MN052967.1	China	2016-06
MN052968.1	China	2016-06
MN052974.1	China	2015-06
MN052975.1	China	2015-06
MN052976.1	China	2015-06
MN052988.1	China	2017-02
MK140460.1	China	2017
MK140461.1	China	2017
MK140463.1	China	2017
MK140465.1	China	2017
MK140468.1	China	2017
MK140469.1	China	2017
MK140472.1	China	2017
MK140473.1	China	2017
MK140475.1	China	2017
MK140476.1	China	2017
MK140477.1	China	2017
MK140478.1	China	2017
MK599459.1	China	2018
MK599460.1	China	2018
MK599461.1	China	2018
MK599462.1	China	2018
MK599463.1	China	2018
MK139829.1	China	2017
MK139830.1	China	2017
MK139831.1	China	2017
MH920548.1	China	2016
MH920549.1	China	2017
MH920563.1	China	2017
MH920564.1	China	2018
MH920565.1	China	2016
MH920568.1	China	2017
MH920569.1	China	2018
MH920572.1	China	2016
MH920576.1	China	2018
MH920577.1	China	2017
MH920582.1	China	2018
MH920584.1	China	2016
MH920588.1	China	2017
MF737376.1	China	2016-11
MF737378.1	China	2015-11
MF737379.1	China	2015-11
MF737380.1	China	2015-11
MF737381.1	China	2015-11
MF737382.1	China	2016-11
MF737383.1	China	2016-11
MF737384.1	China	2016-11
MK504384.1	USA	2017
MK504387.1	USA	2017
MK504403.1	USA	2018
MK504405.1	USA	2018
MK504410.1	USA	2018
MK604480.1	China	2018
MK604481.1	China	2018
MK604482.1	China	2018
MK604483.1	China	2017
MK604485.1	China	2016
MK604490.1	China	2016
MK604494.1	China	2018
MK604498.1	China	2016
MK604499.1	China	2017
MK604502.1	China	2017
MK604504.1	China	2017
MK604508.1	China	2016
MK604509.1	China	2016
MK604510.1	China	2016
MK604511.1	China	2016
MK604515.1	China	2017
MN400446.1	China	2017-08
[truncated: 6,284 more rows]
