# Supplementary material for: An updated phylogeography and population dynamics of porcine circovirus 2 genotypes: are they reaching an equilibrium?
Source: Frontiers journal article supplement (doi:10.3389/fmicb.2024.1500498), 2024-10-29
Supplement: Data_Sheet_1.zip [file Data_Sheet_1.zip]

PCV2a: Country-year dataset

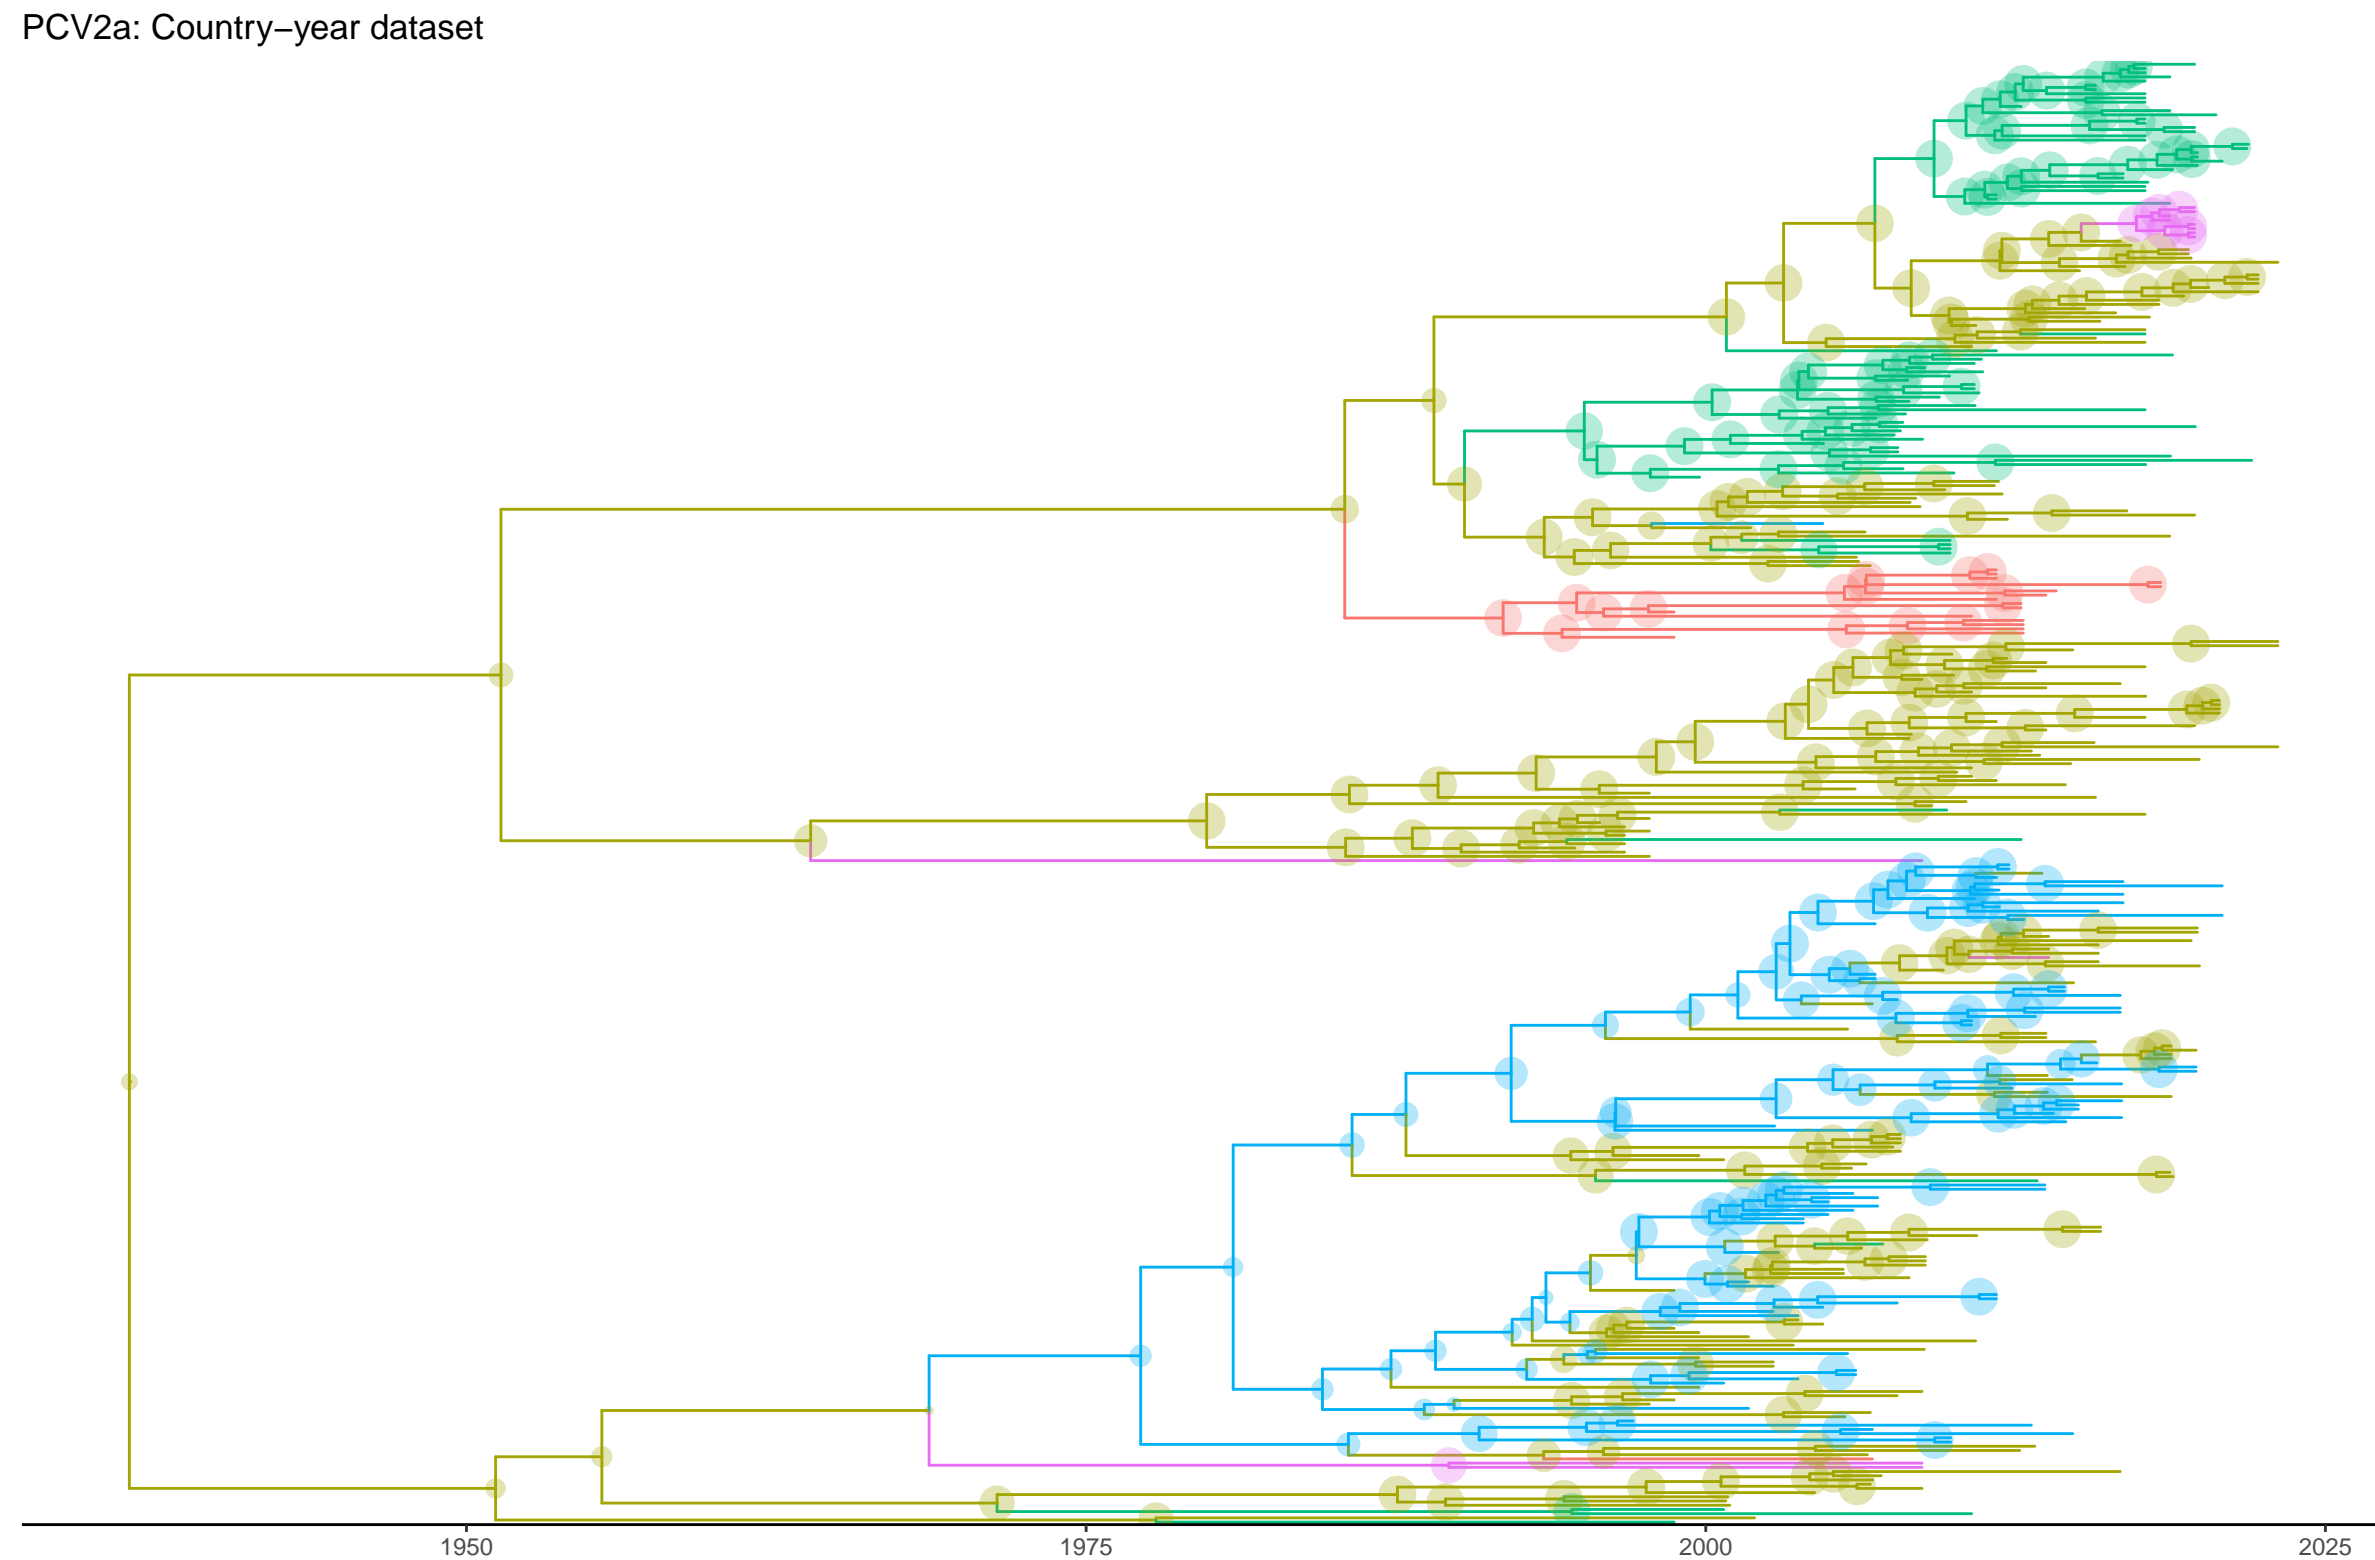

PCV2b: Country-year dataset

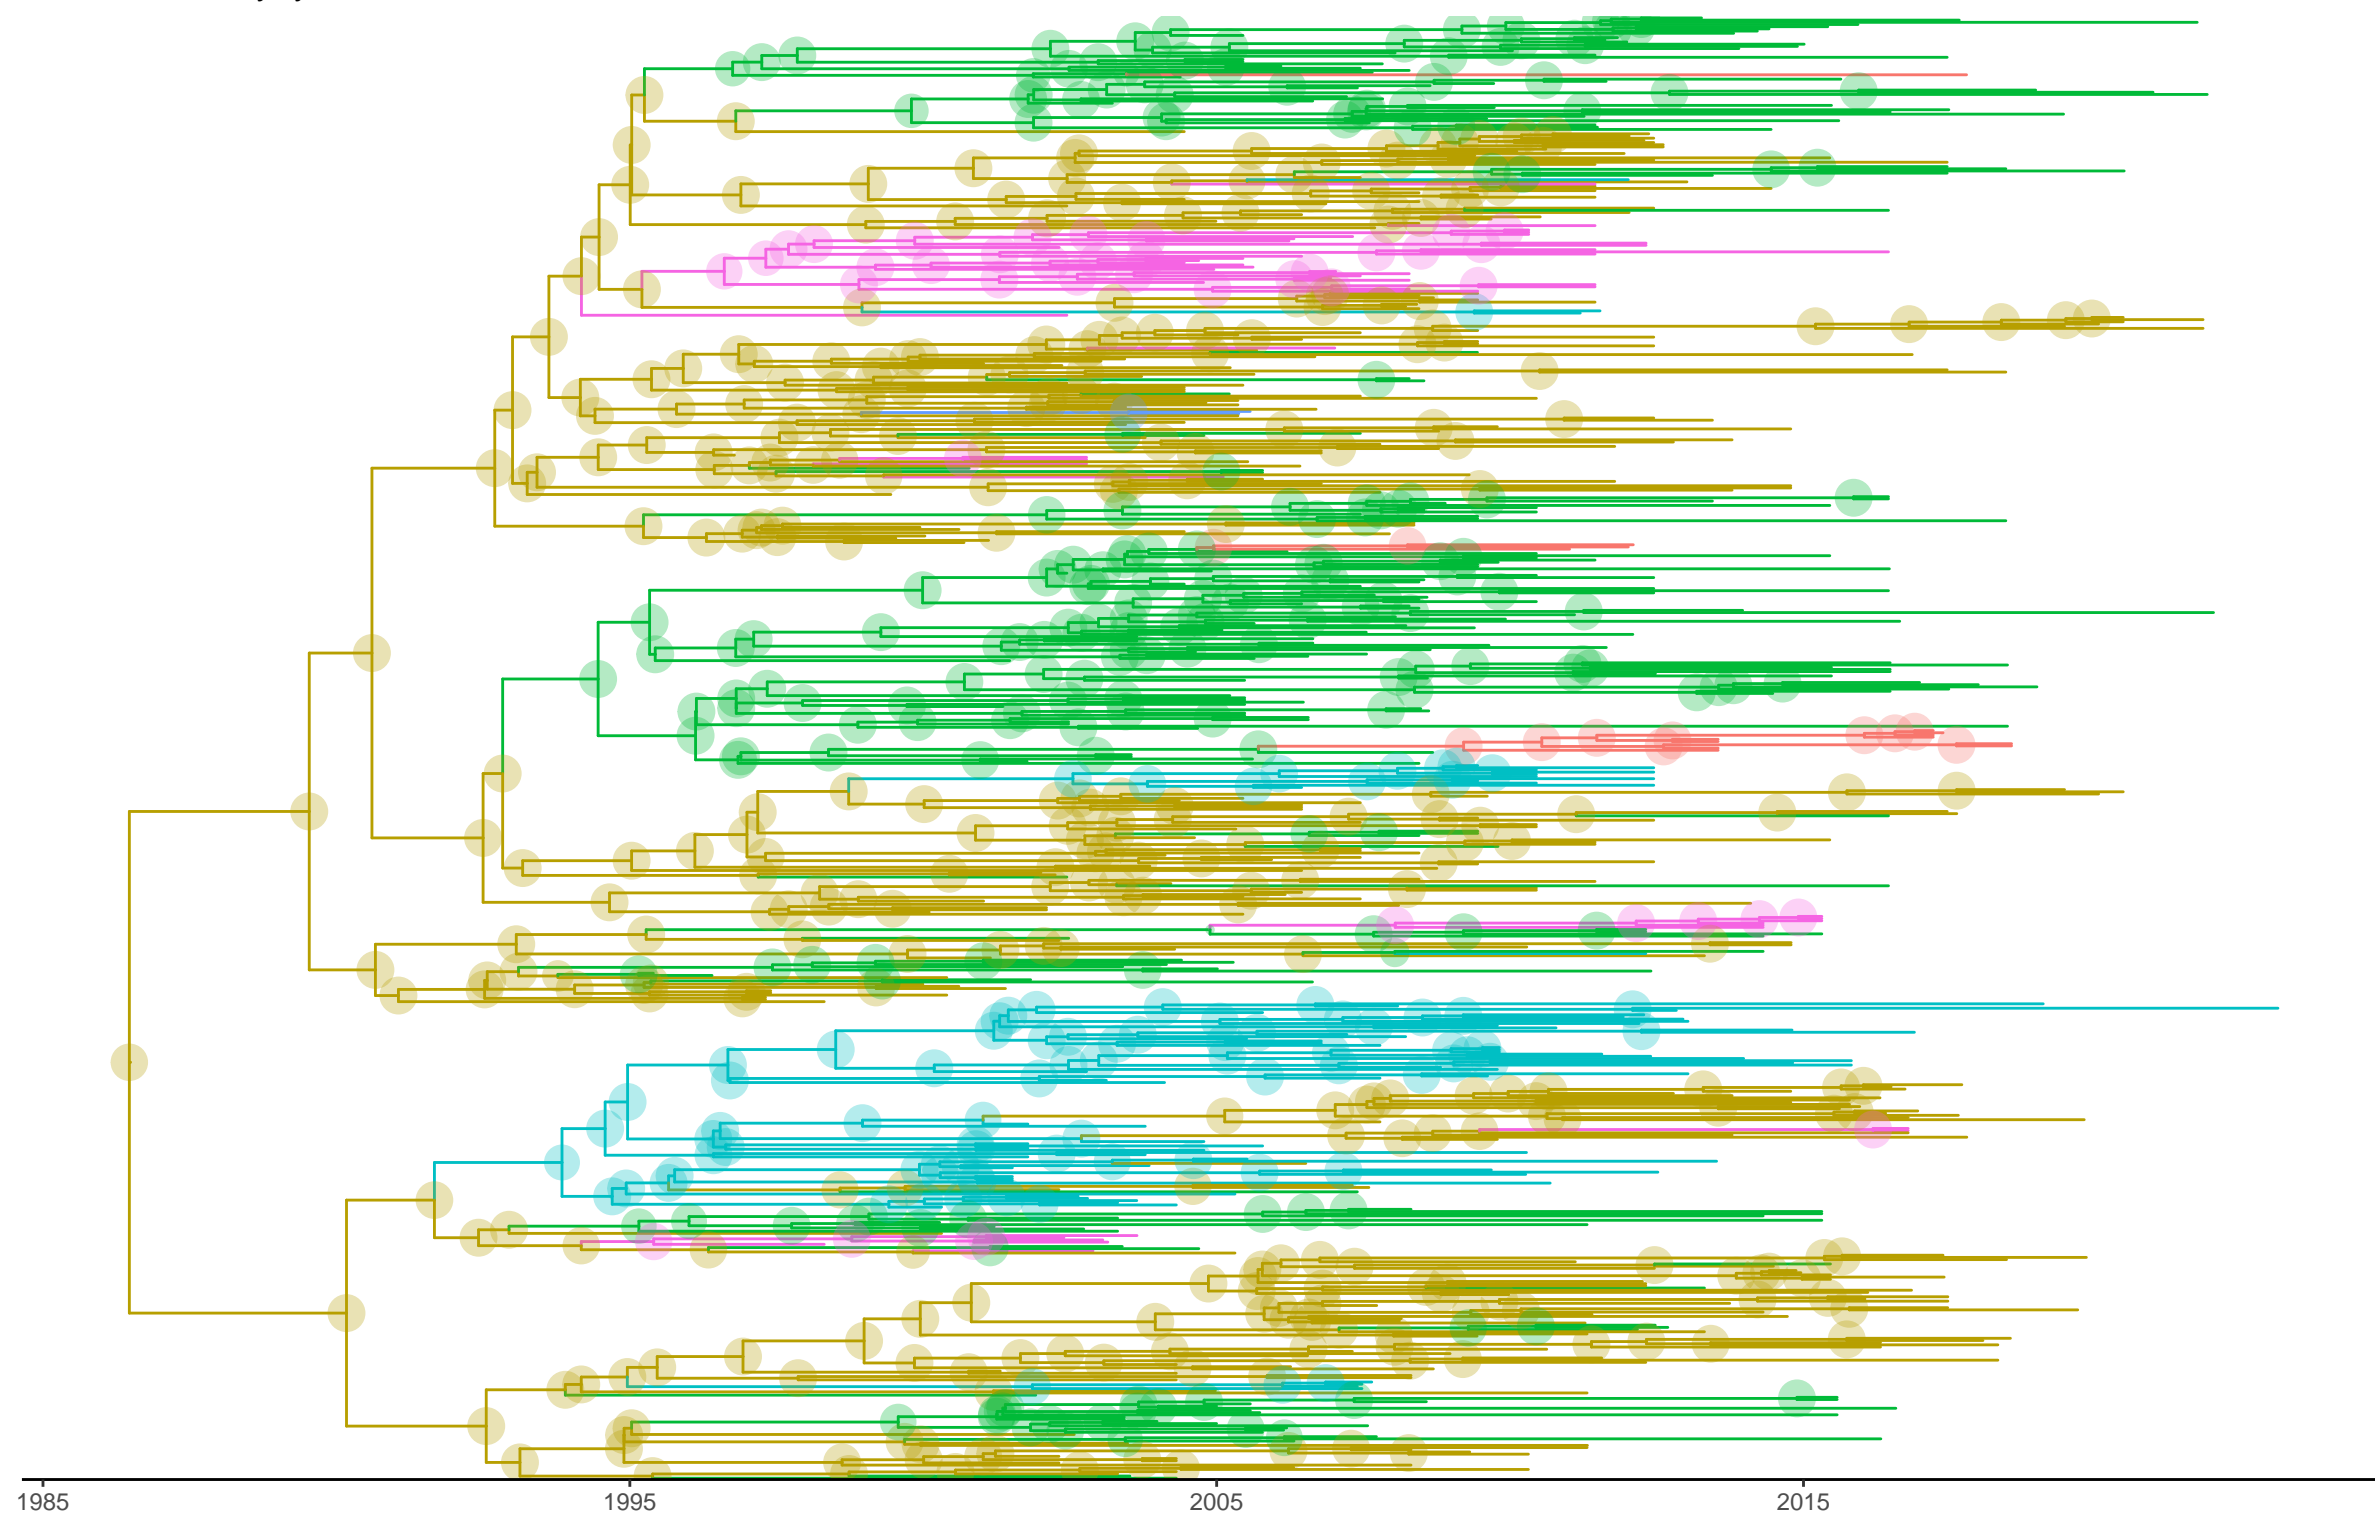

PCV2d: Country-year dataset

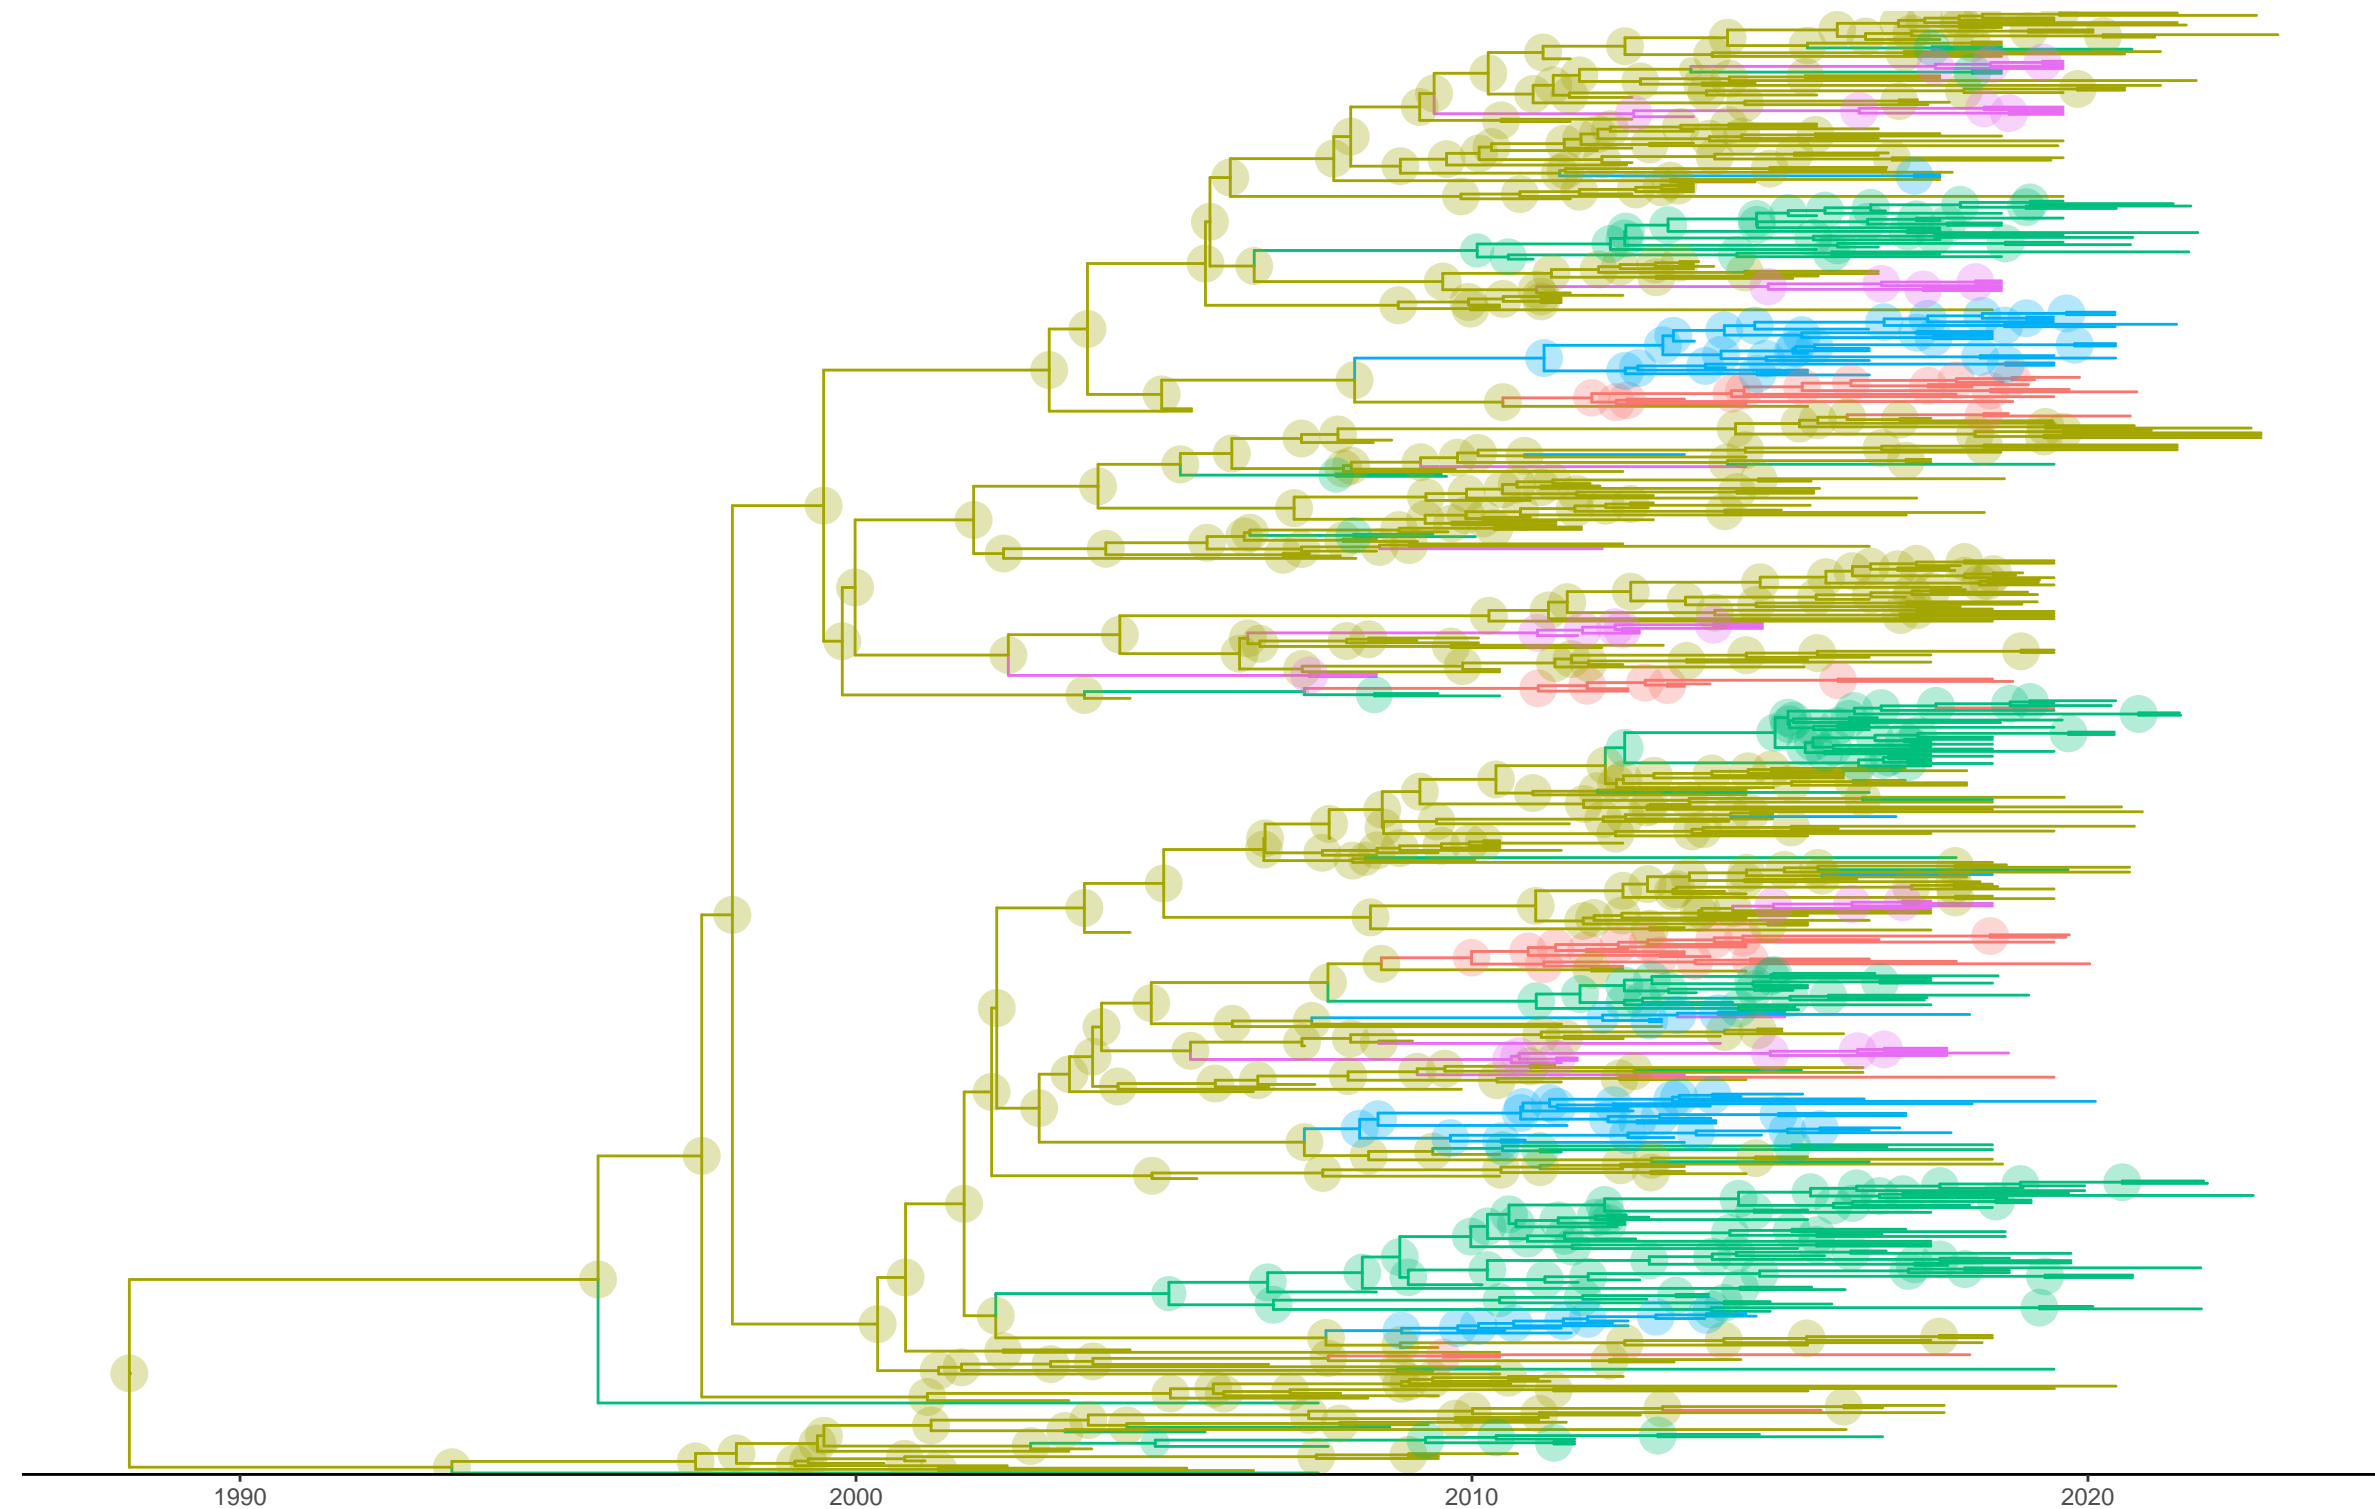

PCV2a: Balanced dataset

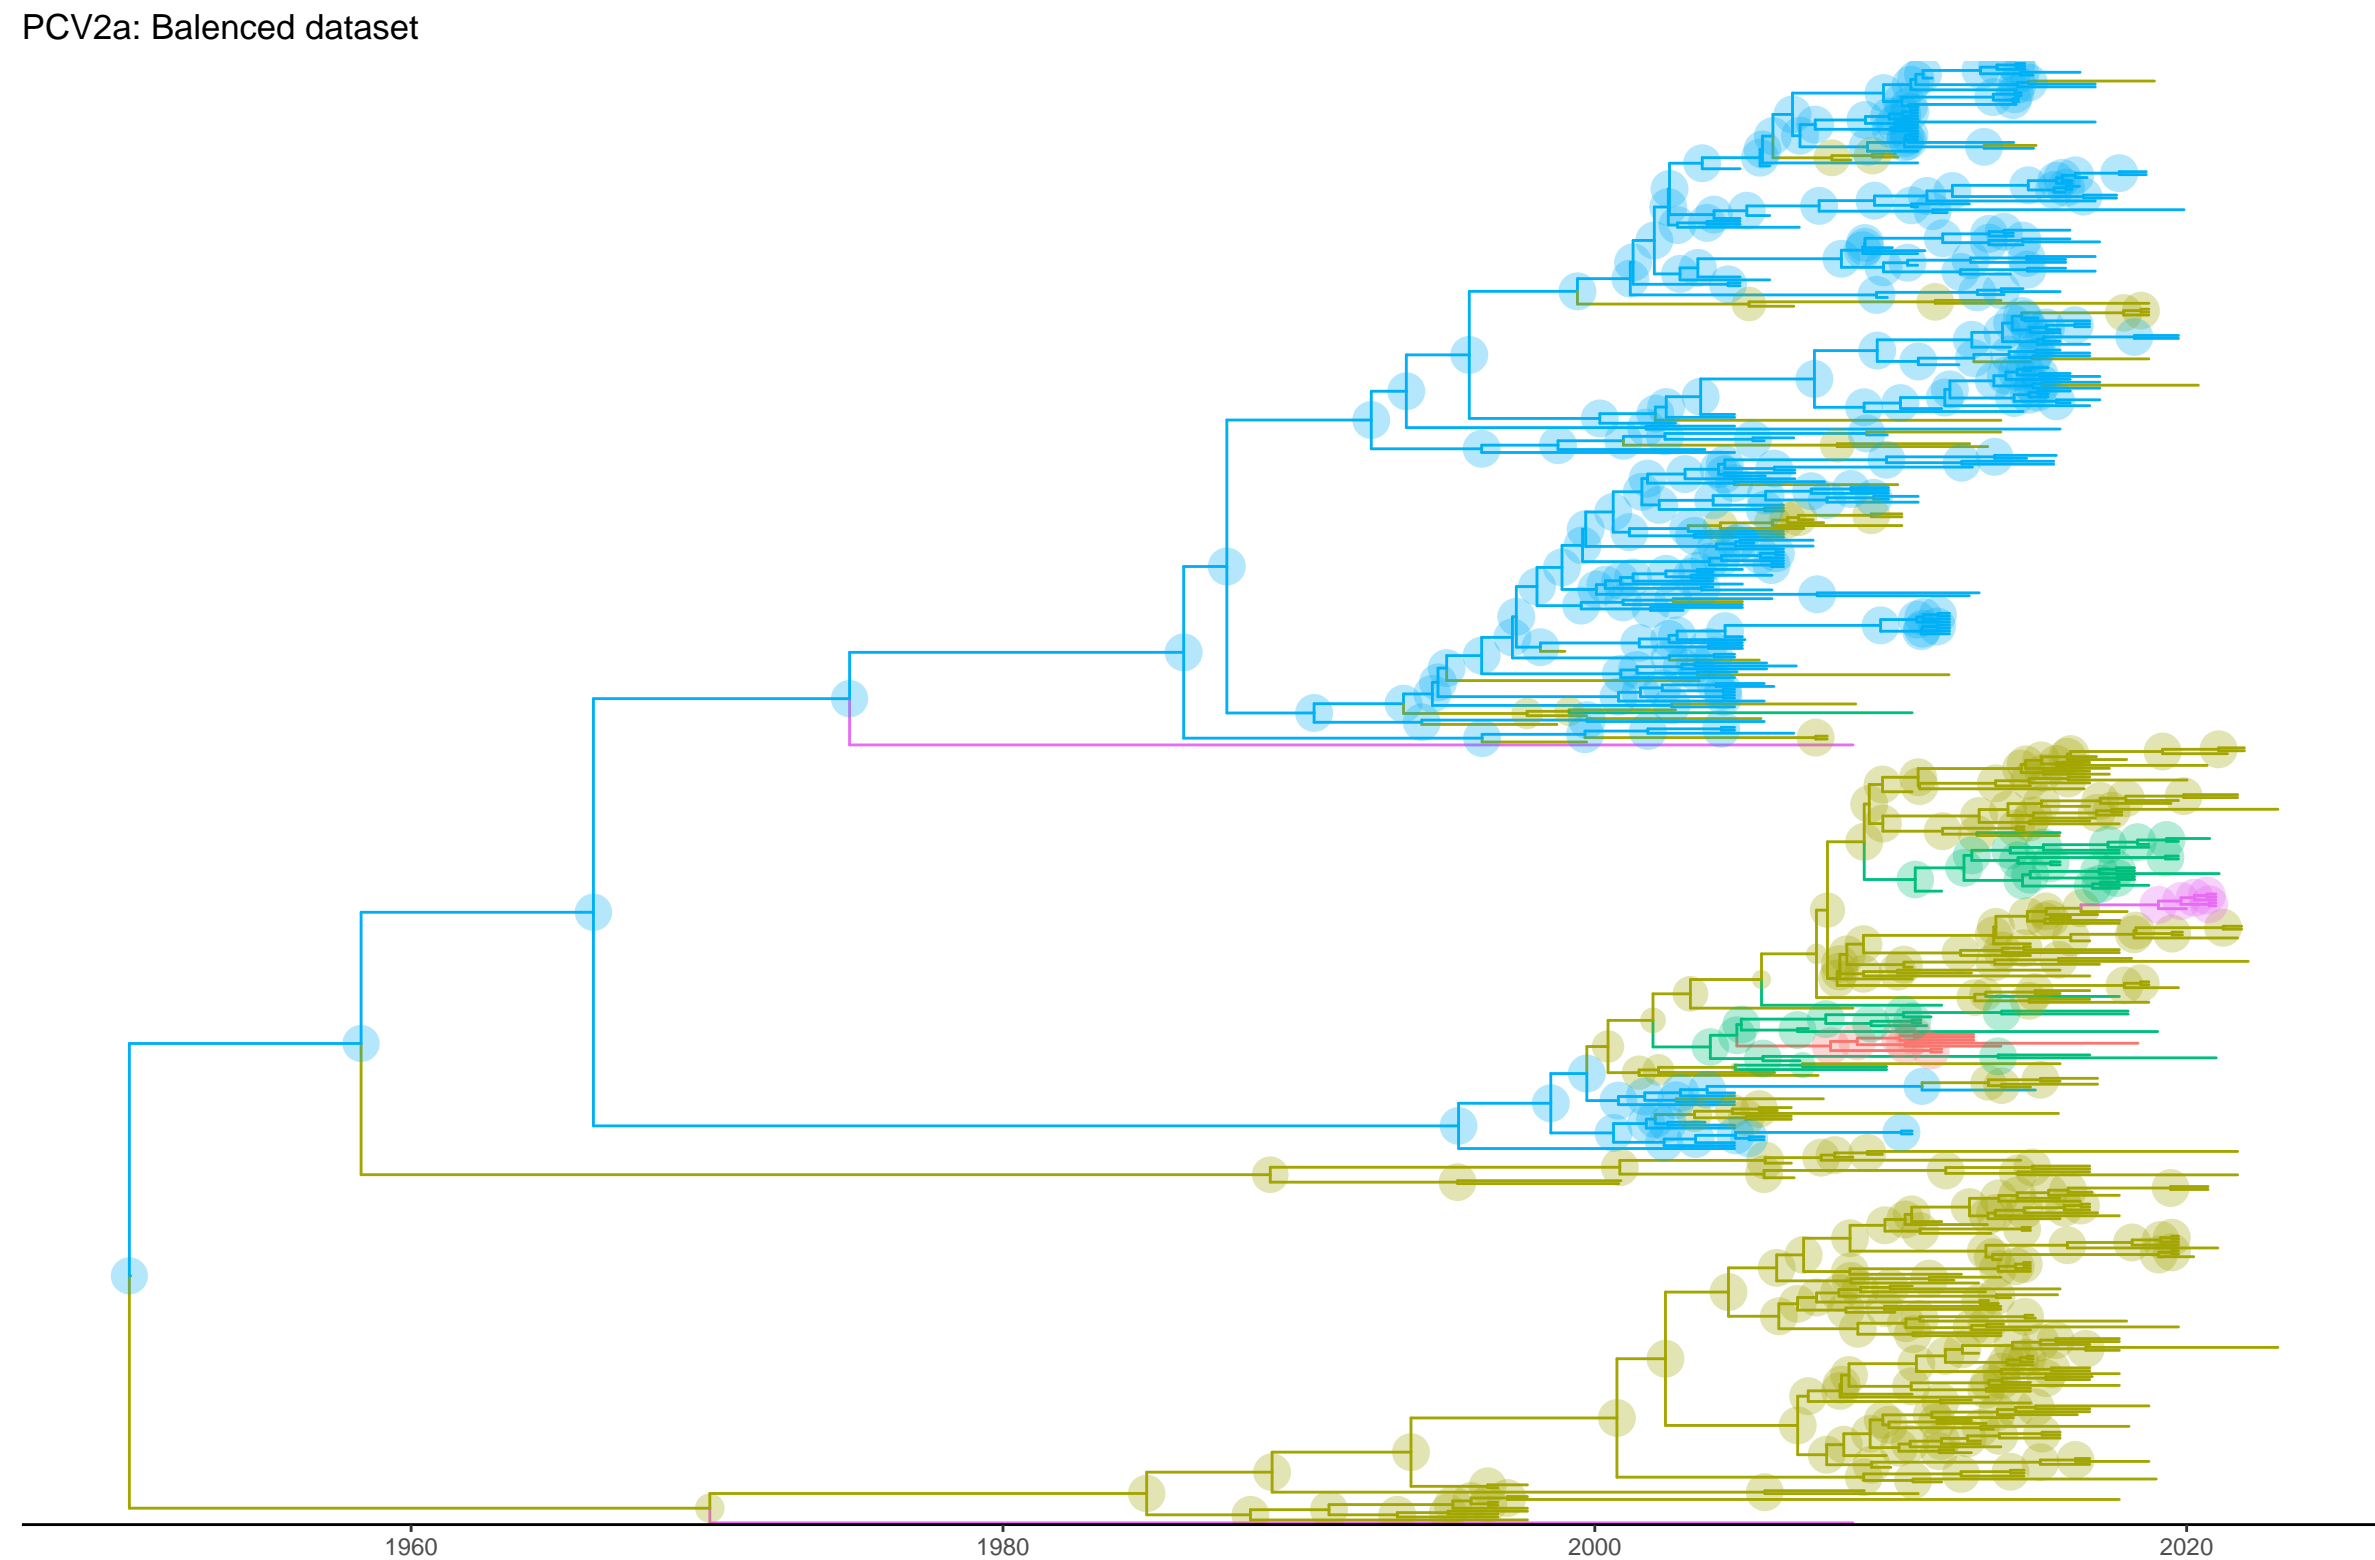

PCV2b: Balanced dataset

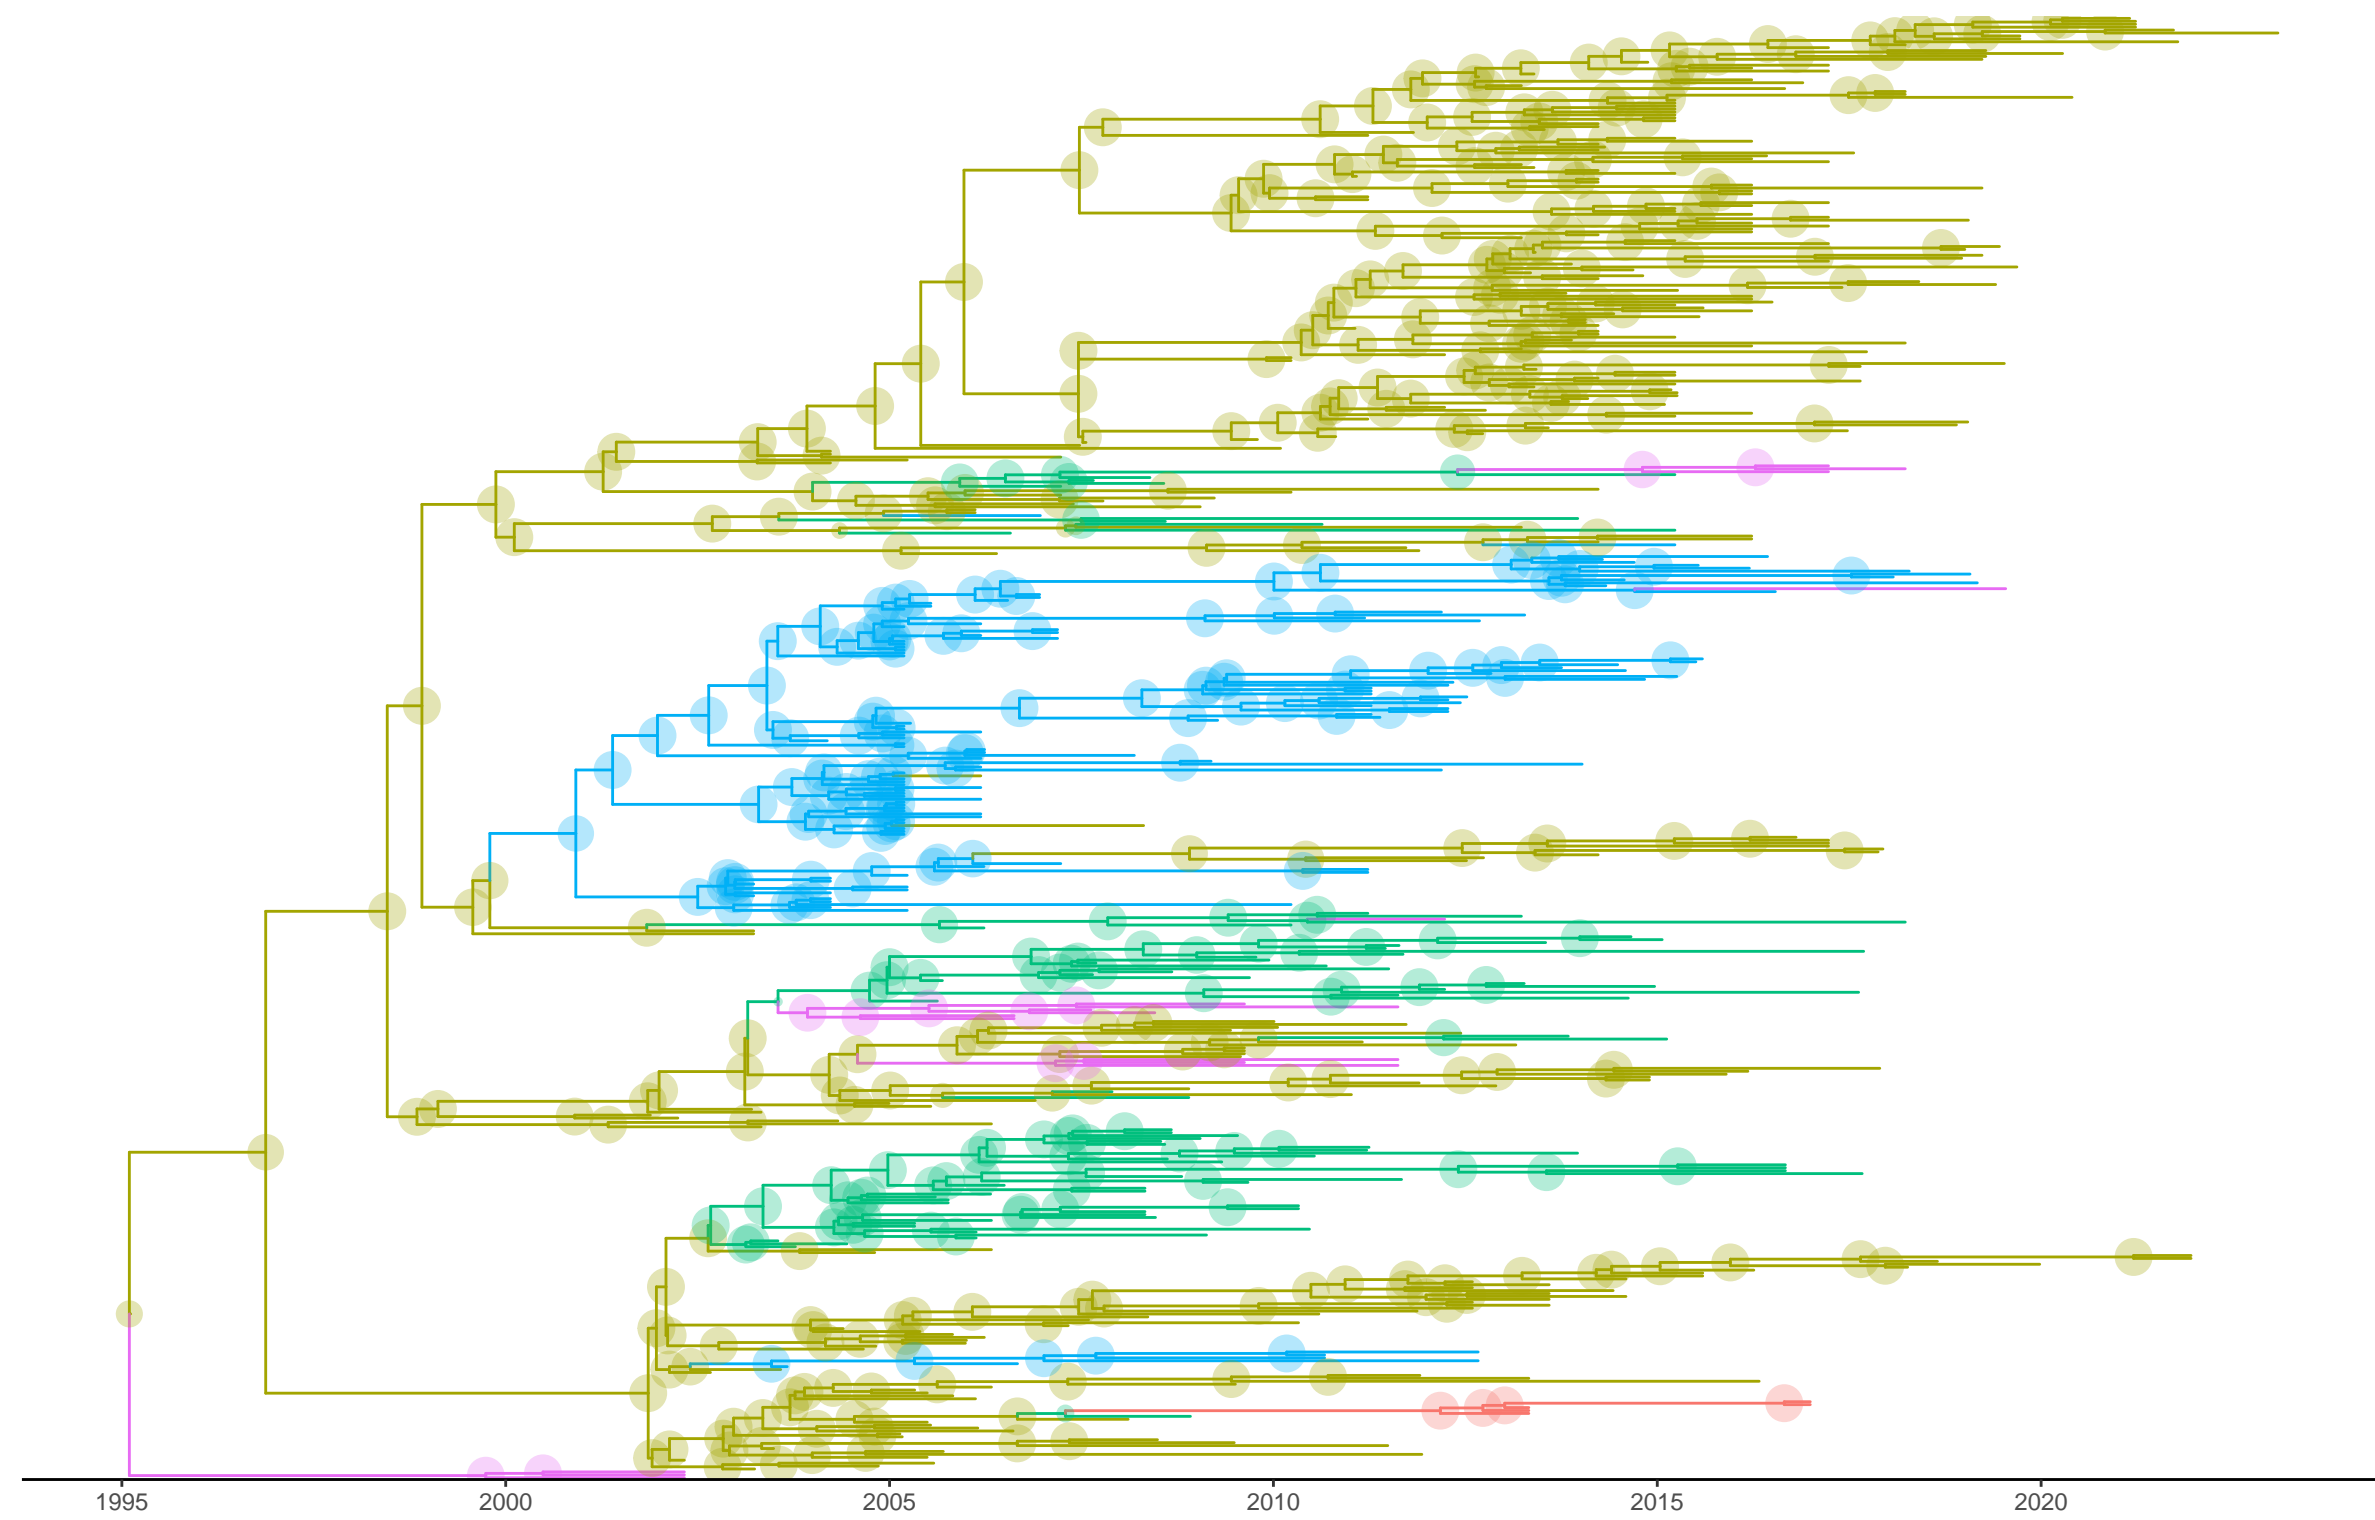

PCV2d: Balanced dataset

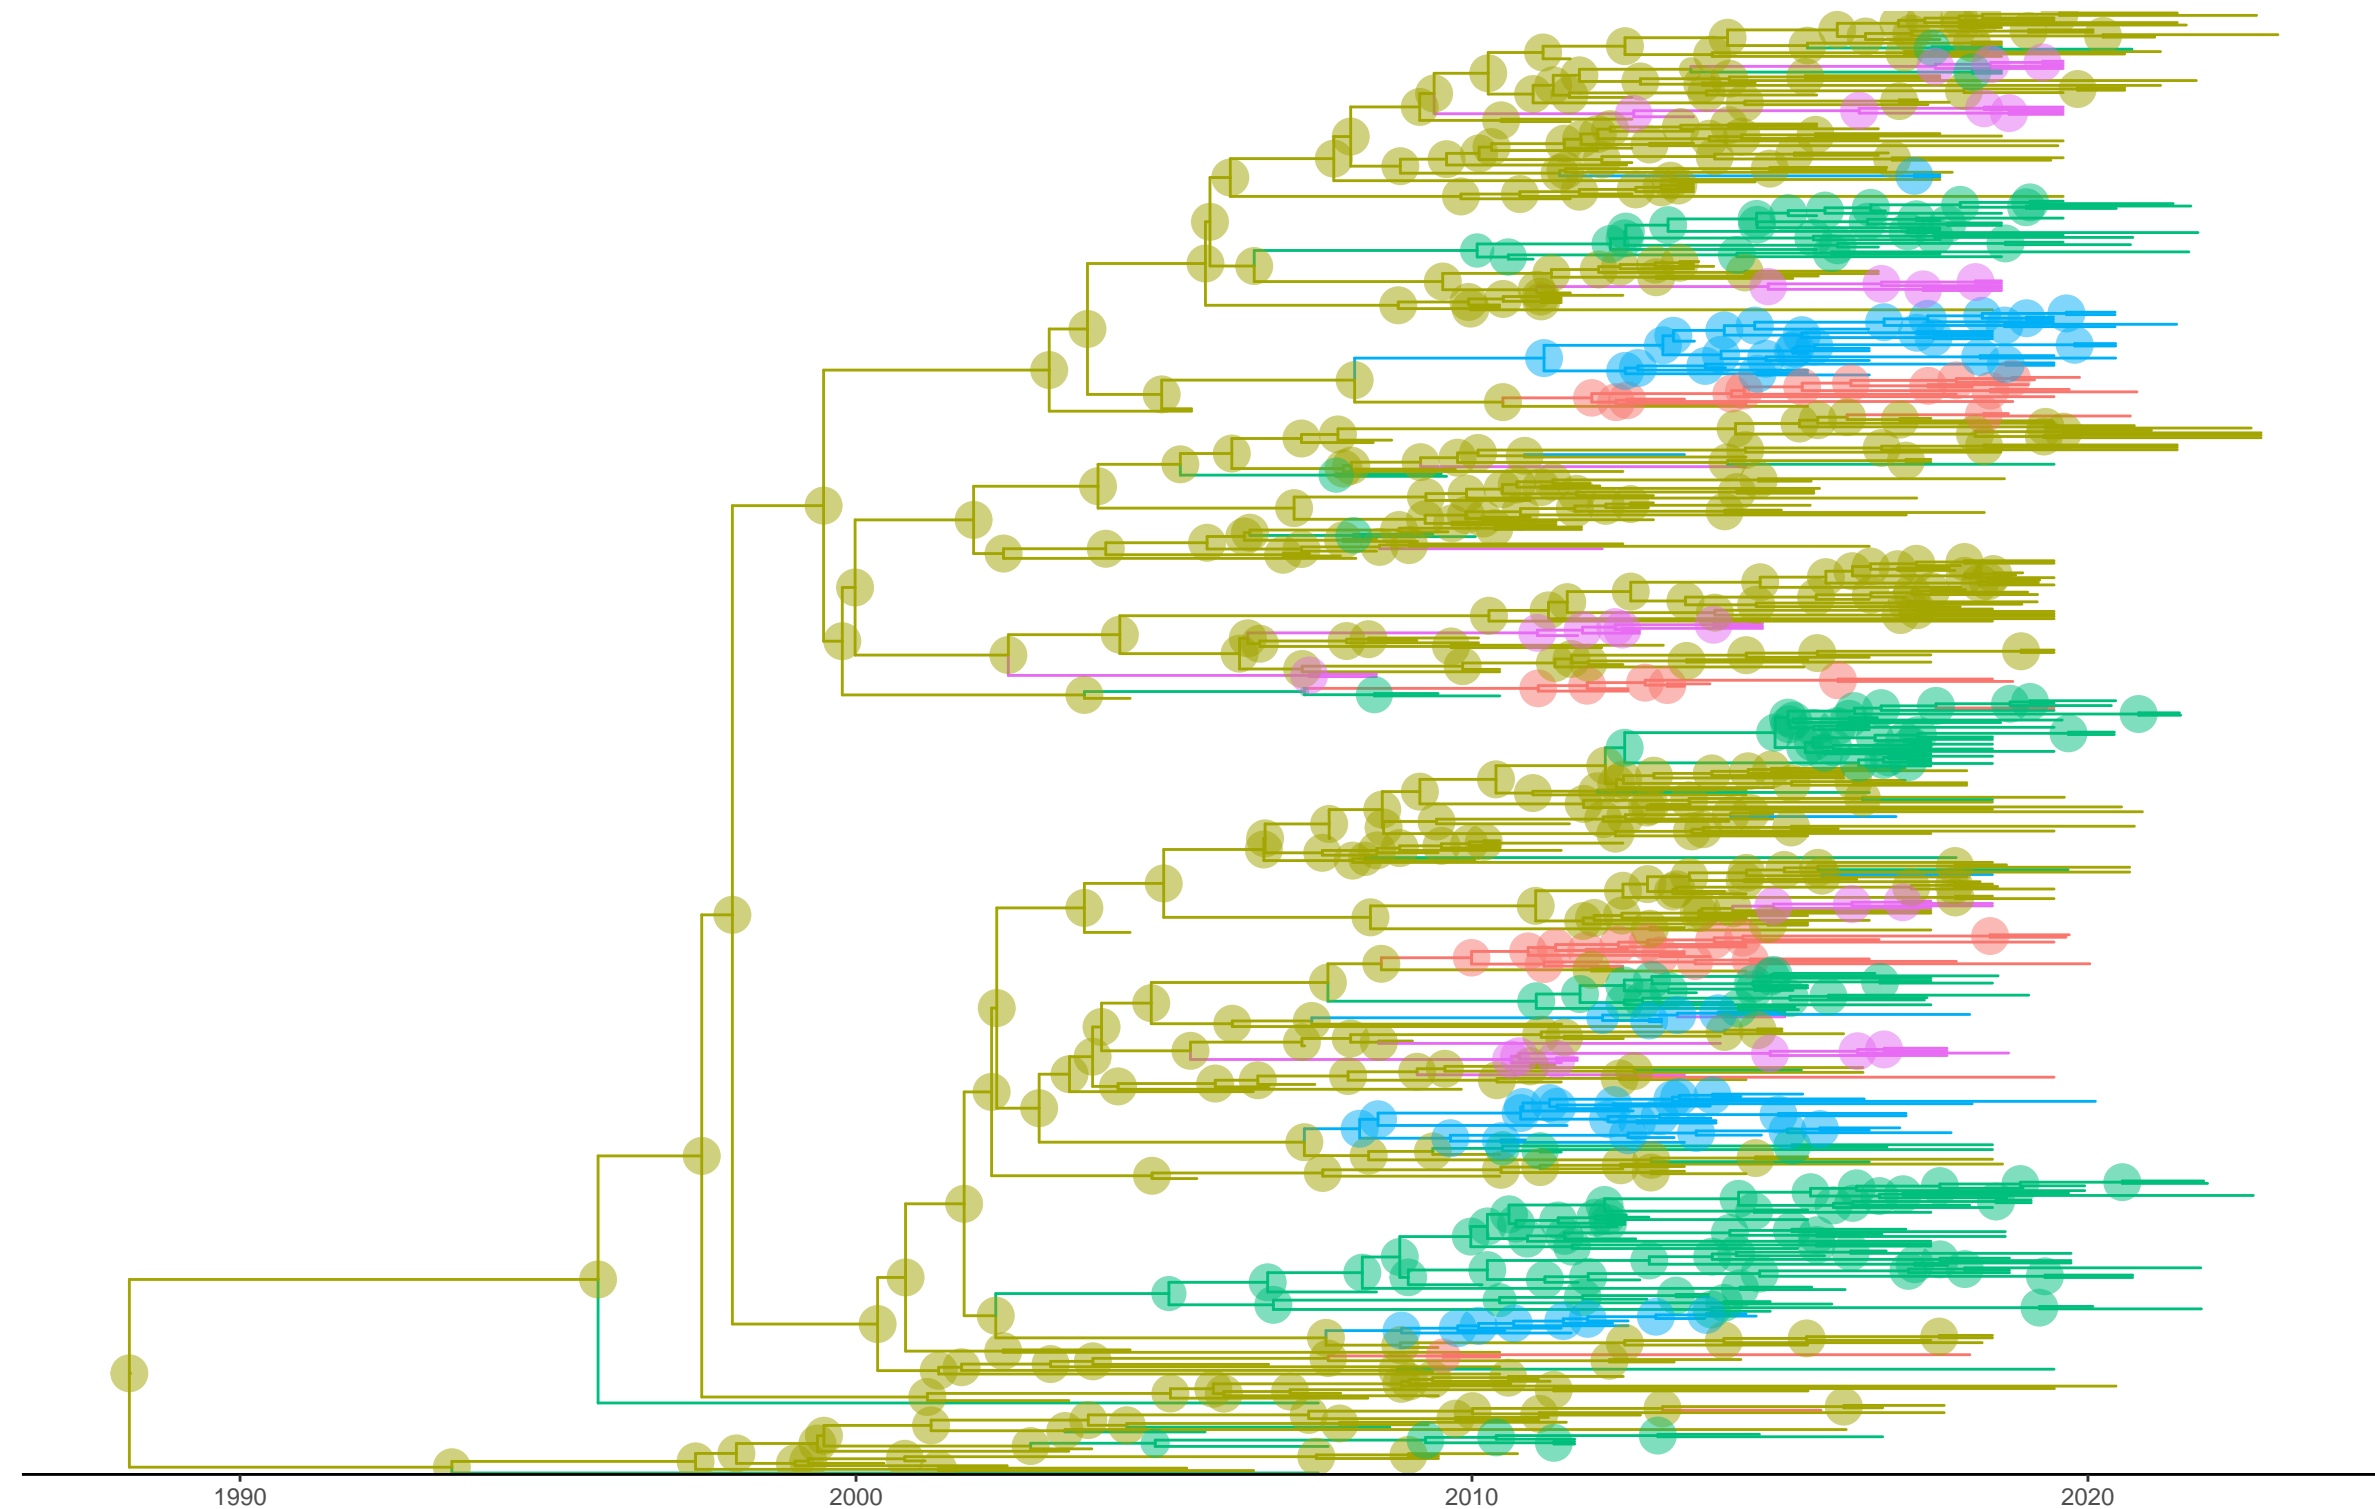

Location — Africa — Asia — Europe — NorthAmerica — SouthAmerica
